# Supplementary material for: MicroRNA-29 Fine-tunes the Expression of Key FOXA2-Activated Lipid Metabolism Genes and Is Dysregulated in Animal Models of Insulin Resistance and Diabetes
Source: Oxford University Press journal article supplement (doi:10.2337/db13-1015), 2014-04-11
Supplement: db131015supplementarydata.xls [file db131015supplementarydata.xls]

## Sheet: Sheet1
miRNA	HFD1	HFD2	Mean.HFD	StDev	LFD1	LFD2	Mean.LFD	StDev2	Ratio HFD/LFD
mmu-mir-22-3p	98707.6	79959.1	89333.4	13257.2	49740.7	68103.6	58922.1	12984.5	1.51613
mmu-mir-192-5p	98494.1	78245.3	88369.7	14318	36784.5	33486.6	35135.6	2331.95	2.51511
mmu-mir-92a-1-3p	20202.7	18798.3	19500.5	993.046	21169.4	30198.4	25683.9	6384.45	0.759248
mmu-mir-122-5p	31218.5	26676.9	28947.7	3211.43	23830	29978.6	26904.3	4347.72	1.07595
mmu-mir-192-5p_+_1	45562.2	29238.6	37400.4	11542.5	16081.3	22648.1	19364.7	4643.39	1.93137
mmu-mir-148a-3p	33983.2	25526.2	29754.7	5980	14366.1	21358.3	17862.2	4944.23	1.66579
mmu-mir-143-3p	12533.9	8682.86	10608.4	2723.07	5750.65	20866.3	13308.5	10688.4	0.797113
mmu-mir-26a-2-5p	15432.3	10265.7	12849	3653.33	7328.89	13989.2	10659	4709.55	1.20546
mmu-mir-26a-1-5p	15397.4	10239.2	12818.3	3647.37	7309.66	13949	10629.3	4694.75	1.20594
mmu-mir-30a-5p	18849.1	16457.8	17653.4	1690.86	9319.07	13488.6	11403.8	2948.31	1.54802
mmu-mir-27b-3p	17357.4	7546.59	12452	6937.3	3974.09	12986.5	8480.29	6372.72	1.46835
mmu-mir-191-5p	8941.99	6861.93	7901.96	1470.82	5615.11	12637.5	9126.3	4965.57	0.865845
mmu-mir-10a-5p	12949.5	9192.25	11070.9	2656.78	5841.34	12434.1	9137.74	4661.81	1.21155
mmu-mir-99b-5p	3130.84	2251.95	2691.39	621.468	3186.97	10904.4	7045.69	5457.05	0.381992
mmu-mir-125a-5p	3697.85	2802.75	3250.3	632.934	3577.21	10828.5	7202.86	5127.45	0.451251
mmu-mir-21-5p	7502.16	6559.55	7030.86	666.526	3195.52	9347.72	6271.62	4350.26	1.12106
mmu-let-7f-2-5p	9000.39	6036.37	7518.38	2095.88	3745.18	8205.91	5975.55	3154.21	1.25819
mmu-mir-378-3p	6920.83	7175.86	7048.35	180.338	4883.16	7628.58	6255.87	1941.3	1.12668
mmu-mir-30d-5p	6215.83	5671.91	5943.87	384.612	4603.34	7301.64	5952.49	1907.99	0.998552
mmu-let-7f-1-5p	7679.42	5136.71	6408.07	1797.97	3171.02	6864.33	5017.68	2611.57	1.2771
mmu-mir-151-3p	3705.37	3420.96	3563.16	201.111	3522.48	6177.23	4849.85	1877.19	0.734695
mmu-mir-486-5p	9606.19	23077	16341.6	9525.29	13429.5	5934.8	9682.17	5299.59	1.6878
mmu-mir-3107-5p	9579.52	23005.5	16292.5	9493.6	13388.7	5920.04	9654.38	5281.17	1.68758
mmu-mir-10a-5p_+_1	5217.34	3676.96	4447.15	1089.22	2685.39	5860.01	4272.7	2244.79	1.04083
mmu-let-7a-1-5p	4262.1	3572.95	3917.53	487.299	3162.34	5490.67	4326.5	1646.38	0.905472
mmu-let-7a-2-5p	4241.5	3542.84	3892.17	494.031	3127.28	5414.66	4270.97	1617.42	0.911308
mmu-mir-126-5p	10331.4	6151.24	8241.3	2955.79	3706.13	4980.68	4343.41	901.238	1.89743
mmu-let-7c-2-5p	3419.47	3462.42	3440.94	30.3681	3691.56	4768.4	4229.98	761.438	0.813466
mmu-let-7c-1-5p	3189.36	3246.57	3217.96	40.4515	3436.94	4480.41	3958.67	737.842	0.812889
mmu-mir-181a-1-5p	1608.46	1713.81	1661.14	74.4918	1871.96	4300.04	3086	1716.91	0.538282
mmu-mir-181a-2-5p	1608.22	1713.81	1661.02	74.6614	1871.84	4299.87	3085.85	1716.88	0.538269
mmu-mir-26b-5p	5801.41	3556.43	4678.92	1587.44	2460.44	4277.23	3368.83	1284.67	1.38888
mmu-let-7g-5p	5134.9	3324.5	4229.7	1280.15	2404.19	4195.44	3299.81	1266.6	1.2818
mmu-mir-100-5p	1617.93	1174.39	1396.16	313.633	1274.32	4103.36	2688.84	2000.44	0.519243
mmu-mir-16-1-5p	5071.71	4262.16	4666.94	572.442	2192.66	3260.44	2726.55	755.034	1.71167
mmu-mir-16-2-5p	5048.66	4243.94	4646.3	569.021	2174.49	3244.56	2709.53	756.65	1.7148
mmu-mir-151-5p	2143.67	1941.14	2042.4	143.207	1478.76	2959.64	2219.2	1047.14	0.920333
mmu-let-7b-5p	2307.76	2275.58	2291.67	22.7563	2746.51	2950.64	2848.58	144.339	0.804495
mmu-mir-30e-5p	3027.03	2945.97	2986.5	57.3213	1469.42	2160.37	1814.9	488.576	1.64555
mmu-let-7i-5p	959.192	1013.56	986.377	38.4457	719.428	2102.54	1410.99	978.011	0.69907
mmu-mir-125b-1-5p	861.094	704.499	782.797	110.729	781.662	1982.51	1382.09	849.129	0.566387
mmu-mir-125b-2-5p	829.92	679.384	754.652	106.445	751.462	1912.23	1331.84	820.785	0.566622
mmu-let-7d-5p	1521.14	1293.73	1407.43	160.801	968.035	1908.55	1438.29	665.046	0.978542
mmu-mir-29a-3p	1629.14	1542.41	1585.77	61.3237	1044.15	1890.85	1467.5	598.704	1.0806
mmu-mir-194-2-5p	2804.23	2045.89	2425.06	536.225	1130.91	1250.78	1190.84	84.7564	2.03642
mmu-mir-126-3p	1410.75	1072.19	1241.47	239.398	662.221	1233.28	947.752	403.802	1.30991
mmu-mir-130a-3p	1133.84	966.671	1050.25	118.204	710.614	1126.48	918.549	294.064	1.14338
mmu-mir-30c-2-5p	1653.24	1461.1	1557.17	135.863	747.061	1112.77	929.914	258.594	1.67453
mmu-mir-30c-1-5p	1653.06	1460.96	1557.01	135.836	747.121	1112.6	929.858	258.429	1.67446
mmu-mir-182-5p	647.222	714.139	680.681	47.3178	696.378	1108.81	902.592	291.63	0.75414
mmu-mir-423-3p	749.047	822.212	785.63	51.7352	753.731	1102.28	928.007	246.463	0.846577
mmu-mir-25-3p	805.55	860.596	833.073	38.9231	534.507	1081.64	808.076	386.884	1.03093
mmu-mir-92a-2-3p	631.125	662.914	647.019	22.4777	652.771	1038.65	845.71	272.857	0.76506
mmu-mir-351-5p	651.728	658.467	655.098	4.76493	635.296	1030.1	832.696	279.166	0.786719
mmu-mir-194-1-5p	2404.78	1608.05	2006.41	563.372	935.581	1009.97	972.777	52.6021	2.06256
mmu-mir-142-5p_-_2	616.797	649.823	633.31	23.3529	224.078	967.163	595.621	525.441	1.06328
mmu-mir-93-5p	595.425	588.6	592.013	4.82577	383.445	924.169	653.807	382.349	0.905485
mmu-let-7d-3p	605.317	570.671	587.994	24.4981	618.619	880.144	749.382	184.927	0.784639
mmu-mir-146a-5p	575.923	475.705	525.814	70.865	291.149	865.872	578.511	406.391	0.90891
mmu-mir-5115_-_1	429.183	1403.8	916.494	689.161	1597.79	767.209	1182.5	587.31	0.775048
mmu-mir-101b-3p	1739.85	1602.91	1671.38	96.8318	731.219	765.22	748.22	24.0429	2.23381
mmu-mir-5099_-_2	321.633	334.605	328.119	9.17288	396.908	732.882	564.895	237.569	0.580849
mmu-mir-423-5p	620.364	466.156	543.26	109.042	381.808	727.132	554.47	244.181	0.979783
mmu-mir-99a-5p	508.198	379.819	444.008	90.7773	329.018	724.214	526.616	279.446	0.843134
mmu-mir-31-5p	265.999	294.841	280.42	20.3944	196.241	662.34	429.29	329.582	0.653218
mmu-mir-23b-3p	783.129	584.296	683.712	140.596	406.065	640.764	523.414	165.957	1.30625
mmu-mir-484	222.295	288.004	255.149	46.4629	253.973	628.527	441.25	264.85	0.578242
mmu-mir-5115_-_6	293.176	1037.89	665.535	526.595	930.662	596.947	763.804	235.973	0.871343
mmu-mir-126-3p_+_1	722.04	573.019	647.529	105.374	338.934	593.428	466.181	179.955	1.38901
mmu-let-7e-5p	168.411	150.912	159.661	12.374	205.35	589.827	397.588	271.866	0.401574
mmu-mir-148b-3p	612.521	466.53	539.525	103.231	300.531	576.179	438.355	194.912	1.23079
mmu-mir-501-3p	213.063	189.251	201.157	16.8373	206.065	558.929	382.497	249.513	0.525905
mmu-mir-199a-2-3p	150.527	100.621	125.574	35.2887	88.6155	555.628	322.122	330.228	0.389834
mmu-mir-27a-3p	274.829	147.547	211.188	90.0014	73.2365	546.59	309.913	334.712	0.681442
mmu-mir-199b-3p	146.99	98.6289	122.809	34.1963	86.6446	544.644	315.644	323.854	0.389075
mmu-mir-199a-1-3p	146.99	98.6289	122.809	34.1963	86.6446	544.644	315.644	323.854	0.389075
mmu-mir-744-5p	412.937	377.293	395.115	25.2037	407.885	530.867	469.376	86.9618	0.841788
mmu-mir-125b-1-5p_+_1	217.209	168.405	192.807	34.5097	207.126	504.135	355.631	210.017	0.542156
mmu-mir-140-3p_+_1	345.852	372.135	358.994	18.5846	242.481	492.55	367.515	176.825	0.976813
mmu-mir-125b-2-5p_+_1	215.95	166.84	191.395	34.7263	205.004	489.718	347.361	201.323	0.550999
mmu-mir-127-3p	87.7071	84.8074	86.2572	2.05039	87.6897	474.056	280.873	273.202	0.307104
mmu-mir-5115	308.623	923.205	615.914	434.575	2581.43	473.026	1527.23	1490.87	0.403289
mmu-mir-101b-3p_-_1	997.507	836.802	917.155	113.636	354.029	465.79	409.909	79.0275	2.23746
mmu-mir-107-3p	775.905	604.917	690.411	120.907	397.808	459.875	428.841	43.8879	1.60995
mmu-mir-103-2-3p	466.712	410.045	438.378	40.0698	266.273	450.134	358.204	130.009	1.22382
mmu-mir-200b-3p	161.925	89.6098	125.768	51.1348	87.0226	449.641	268.332	256.41	0.468702
mmu-mir-150-5p	90.3449	128.563	109.454	27.0242	120.558	442.303	281.431	227.508	0.388919
mmu-mir-103-1-3p	454.512	402.076	428.294	37.0778	258.966	434.301	346.633	123.981	1.23558
mmu-mir-221-3p	300.83	282.454	291.642	12.9936	225.683	411.066	318.374	131.086	0.916035
mmu-mir-23a-3p	243.697	170.148	206.923	52.007	127.775	408.527	268.151	198.522	0.771666
mmu-mir-186-5p	465.108	440.837	452.972	17.1627	221.655	392.229	306.942	120.614	1.47576
mmu-mir-101a-3p	616.621	711.524	664.072	67.1065	337.079	368.192	352.635	22.0001	1.88317
mmu-mir-191-5p_+_1	227.091	183.488	205.29	30.8318	150.435	364.896	257.666	151.647	0.79673
mmu-mir-30b-5p	478.577	475.998	477.288	1.82365	219.497	359.461	289.479	98.9693	1.64878
mmu-mir-5115_-_2	189.802	624.316	407.059	307.248	372.226	346.016	359.121	18.5335	1.13349
mmu-mir-28-5p	281.232	268.339	274.785	9.11702	205.417	337.693	271.555	93.5335	1.0119
mmu-mir-320-3p	227.99	234.643	231.317	4.70425	273.5	336.92	305.21	44.8446	0.757895
mmu-mir-24-1-3p	272.134	228.821	250.477	30.6267	142.531	323.215	232.873	127.762	1.0756
mmu-mir-24-2-3p	272.134	228.821	250.477	30.6267	142.531	323.215	232.873	127.762	1.0756
mmu-mir-5105_+_8	442.522	400.416	421.469	29.7734	297.757	322.76	310.258	17.6796	1.35845
mmu-mir-140-3p	199.065	204.975	202.02	4.17929	128.321	312.547	220.434	130.268	0.916464
mmu-mir-101a-3p_-_1	454.579	437.671	446.125	11.9554	201.467	302.574	252.02	71.4931	1.77019
mmu-mir-15a-5p	619.345	469.927	544.636	105.655	226.653	301.734	264.194	53.0905	2.0615
mmu-mir-181c-5p	108.869	112.555	110.712	2.60589	80.6551	300.79	190.723	155.659	0.580487
mmu-mir-802-5p	544.048	398.993	471.52	102.569	168.769	292.724	230.746	87.6488	2.04346
mmu-mir-30a-3p	331.434	243.964	287.699	61.8513	193.785	291.908	242.846	69.3839	1.1847
mmu-mir-5115_-_8	218.53	1049.79	634.158	587.786	2060.05	280.709	1170.38	1258.19	0.541839
mmu-mir-142-5p	116.509	226.685	171.597	77.9057	76.6384	267.235	171.937	134.772	0.998025
mmu-mir-378-3p_+_1	274.499	262.574	268.537	8.43178	170.249	260.417	215.333	63.7582	1.24708
mmu-mir-328-3p	177.887	184.313	181.1	4.54351	188.832	259.348	224.09	49.8621	0.808157
mmu-mir-5115_-_5	123.138	419.258	271.198	209.389	302.76	252.733	277.746	35.3747	0.976423
mmu-mir-152-3p	286.062	191.777	238.92	66.6696	147.605	242.091	194.848	66.8119	1.22618
mmu-mir-203-3p	415.644	303.229	359.437	79.4896	185.476	232.823	209.15	33.479	1.71856
mmu-mir-139-5p	141.362	146.124	143.743	3.36717	158.976	232.608	195.792	52.0663	0.734164
mmu-mir-5115_-_7	118.841	387.61	253.225	190.048	707.441	225.443	466.442	340.824	0.542888
mmu-mir-451	497.826	1456.31	977.069	677.751	372.954	223.383	298.169	105.763	3.2769
mmu-mir-30a-3p_+_1	266.928	194.979	230.953	50.8759	152.456	220.251	186.354	47.9378	1.23933
mmu-mir-1839-5p	167.471	138.417	152.944	20.5443	98.848	217.29	158.069	83.7511	0.967576
mmu-mir-34a-5p	49.6387	35.8582	42.7484	9.74434	20.8005	212.398	116.599	135.48	0.366627
mmu-mir-652-3p	65.8852	96.6178	81.2515	21.7312	95.6339	206.134	150.884	78.1351	0.538504
mmu-mir-676-3p	111.987	102.879	107.433	6.44042	120.74	199.44	160.09	55.6491	0.671078
mmu-mir-98-5p	247.992	170.336	209.164	54.9111	105.056	198.339	151.697	65.9609	1.37882
mmu-mir-214-3p	32.1133	30.0715	31.0924	1.44375	34.5058	198.203	116.355	115.752	0.267221
mmu-mir-195-5p	73.8586	56.8999	65.3793	11.9916	44.4715	194.391	119.431	106.009	0.547422
mmu-mir-425-5p	155.99	155.101	155.546	0.629003	91.7528	193.089	142.421	71.6558	1.09215
mmu-mir-203-3p_+_1	374.718	235.212	304.965	98.6457	141.076	190.071	165.574	34.6452	1.84187
mmu-mir-340-5p	243.887	227.837	235.862	11.3493	105.721	188.913	147.317	58.8257	1.60105
mmu-mir-29a-3p_-_1	115.614	104.729	110.171	7.69706	79.23	187.597	133.414	76.6271	0.825787
mmu-mir-22-3p_+_1	278.289	224.967	251.628	37.7039	132.99	184.121	158.556	36.1554	1.587
mmu-mir-214-3p_-_1	23.1707	18.854	21.0124	3.0524	26.2584	183.735	104.997	111.353	0.200124
mmu-mir-149-5p	26.498	25.1861	25.842	0.927641	19.0419	182.834	100.938	115.819	0.256019
mmu-mir-15b-5p	74.2183	103.519	88.8687	20.7188	67.344	178.293	122.819	78.4528	0.723577
mmu-mir-5109_+_5	120.38	314.162	217.271	137.025	409.749	171.792	290.771	168.261	0.747224
mmu-mir-30c-2-3p	156.31	139.591	147.95	11.8224	144.997	164.684	154.841	13.9205	0.955501
mmu-mir-532-5p	92.0235	100.175	96.0993	5.76411	60.8855	163.74	112.313	72.729	0.855641
mmu-mir-497-5p	43.7636	38.3483	41.056	3.8292	30.3215	160.221	95.2714	91.853	0.430937
mmu-mir-342-3p	74.7579	65.3842	70.071	6.62815	35.4155	159.449	97.4322	87.7049	0.719177
mmu-mir-181b-2-5p	65.9851	57.8486	61.9169	5.75344	59.3189	159.041	109.18	70.5144	0.567107
mmu-mir-145-5p	93.4743	86.5861	90.0302	4.8707	89.1452	158.132	123.638	48.7808	0.728173
mmu-mir-143-3p_-_1	94.7812	63.819	79.3001	21.8936	45.5429	152.798	99.1705	75.8409	0.799634
mmu-mir-181b-1-5p	62.6279	54.2201	58.424	5.94527	55.9229	151.06	103.492	67.2723	0.564529
mmu-mir-146b-5p	52.2484	34.053	43.1507	12.8661	21.2476	150.297	85.7724	91.2519	0.503084
mmu-mir-30e-3p	229.399	150.014	189.707	56.1341	109.855	148.421	129.138	27.2708	1.46902
mmu-mir-148a-5p	123.857	155.457	139.657	22.3442	90.2367	147.692	118.964	40.627	1.17394
mmu-mir-92b-3p	24.2498	18.0358	21.1428	4.39399	24.237	146.233	85.235	86.2643	0.248053
mmu-mir-199a-1-5p	29.6853	32.5735	31.1294	2.04227	25.187	143.201	84.1939	83.4483	0.369735
mmu-mir-199a-2-5p	29.6853	32.5735	31.1294	2.04227	25.187	143.201	84.1939	83.4483	0.369735
mmu-mir-122-3p	206.049	173.03	189.539	23.3479	109.703	142.972	126.338	23.5246	1.50026
mmu-mir-30a-5p_+_1	196.836	172.366	184.601	17.3033	95.6137	140.569	118.091	31.7882	1.56321
mmu-mir-802-3p	140.463	112.27	126.367	19.9355	64.706	138.166	101.436	51.9442	1.24578
mmu-mir-361-5p	126.015	104.302	115.158	15.3538	80.1094	137.651	108.88	40.6883	1.05766
mmu-mir-29c-3p	242.74	236.671	239.706	4.29159	115.747	133.689	124.718	12.687	1.92198
mmu-mir-222-3p	79.9136	86.8707	83.3921	4.91941	68.284	131.73	100.007	44.863	0.833863
mmu-mir-92a-1-3p_+_1	74.0984	76.412	75.2552	1.63599	74.3179	128.34	101.329	38.1994	0.742682
mmu-mir-574-3p	84.9694	72.7005	78.8349	8.67538	65.0345	122.161	93.5979	40.3947	0.842273
mmu-mir-17-5p	78.6246	63.0957	70.8601	10.9806	42.9655	119.057	81.0115	53.8051	0.874692
mmu-mir-5115_-_3	62.8078	202.39	132.599	98.6995	149.982	115.768	132.875	24.1932	0.997922
mmu-mir-183-5p	44.6029	51.6528	48.1279	4.98504	66.7376	112.85	89.7938	32.6064	0.535982
mmu-mir-671-3p	78.4298	74.2776	76.3537	2.93603	62.7048	108.817	85.7607	32.606	0.890311
mmu-mir-28-3p	93.6422	80.254	86.9481	9.46687	67.5563	107.358	87.457	28.1439	0.994181
mmu-mir-10a-5p_-_1	93.7621	69.9376	81.8498	16.8464	43.0565	105.212	74.1344	43.9508	1.10407
mmu-mir-5109_+_4	70.1317	180.749	125.441	78.2185	293.401	104.74	199.071	133.403	0.630131
mmu-mir-122-3p_+_1	184.467	168.192	176.329	11.508	93.9359	103.238	98.5872	6.57788	1.78856
mmu-mir-423-3p_-_1	72.9294	75.9851	74.4573	2.16076	78.7752	98.7331	88.7541	14.1123	0.838916
mmu-mir-1839-5p_+_1	63.1875	49.803	56.4952	9.46425	31.4737	95.6007	63.5372	45.3446	0.889168
mmu-mir-200a-3p	44.3631	30.9134	37.6383	9.51036	19.709	94.4851	57.097	52.8747	0.659199
mmu-mir-301a-3p	62.588	52.1864	57.3872	7.355	32.3833	93.8415	63.1124	43.4574	0.909286
mmu-mir-145-3p	62.3282	53.9295	58.1289	5.93874	33.8994	92.2538	63.0766	41.2628	0.921559
mmu-mir-326-3p	31.0627	36.8898	33.9763	4.12034	37.8499	91.8963	64.8731	38.2166	0.523735
mmu-mir-151-3p_-_1	39.3873	43.3998	41.3935	2.83727	50.273	91.224	70.7485	28.9567	0.585079
mmu-mir-322-5p	124.157	86.0169	105.087	26.969	44.4513	90.7949	67.6231	32.7699	1.55401
mmu-mir-331-3p	40.6462	46.6725	43.6594	4.26125	54.9425	88.9069	71.9247	24.0165	0.607015
mmu-mir-1247-5p	149.036	93.4873	121.262	39.2789	174.712	86.075	130.394	62.6761	0.929966
mmu-mir-20a-5p	57.5522	58.1865	57.8693	0.448554	29.5028	85.6745	57.5886	39.7194	1.00487
mmu-mir-132-3p	21.602	20.0161	20.8091	1.12146	16.313	83.1	49.7065	47.2255	0.418639
mmu-mir-181a-2-3p_-_3	28.9859	23.2651	26.1255	4.04521	24.0753	81.0546	52.5649	40.2905	0.497014
mmu-mir-5109_+_3	58.1117	143.622	100.867	60.4652	219.838	80.8115	150.325	98.3064	0.670995
mmu-mir-5109_-_2	47.2108	114.476	80.8433	47.5635	148.697	76.635	112.666	50.9552	0.717549
mmu-mir-223-3p	37.5888	36.5341	37.0614	0.74578	17.7077	75.9056	46.8067	41.1521	0.791798
mmu-mir-5109_-_1	72.15	92.7166	82.4333	14.5428	163.514	73.3597	118.437	63.7485	0.696012
mmu-mir-199a-2-3p_-_1	16.5063	11.093	13.7997	3.82775	10.5114	73.1022	41.8068	44.2584	0.330081
mmu-mir-146a-5p_-_1	31.1591	30.8556	31.0074	0.214585	16.0401	72.2262	44.1331	39.7296	0.702587
mmu-mir-199a-1-3p_-_1	16.2065	10.9507	13.5786	3.71641	10.4508	71.8579	41.1543	43.4214	0.329944
mmu-mir-199b-3p_-_1	16.2065	10.9507	13.5786	3.71641	10.4508	71.8579	41.1543	43.4214	0.329944
mmu-mir-872-5p	65.9452	48.5224	57.2338	12.3198	31.0492	70.1129	50.5811	27.6222	1.13153
mmu-mir-1843-5p	93.6422	95.017	94.3296	0.972173	53.6084	68.3107	60.9596	10.3961	1.54741
mmu-mir-181d-5p	21.2024	21.3679	21.2851	0.117016	18.4759	66.4228	42.4493	33.9036	0.501424
mmu-mir-455-3p	38.8477	35.9293	37.3885	2.06362	68.2233	66.294	67.2587	1.36422	0.555891
mmu-mir-27b-3p_-_1	59.8003	26.1466	42.9734	23.7968	17.7684	66.294	42.0312	34.3128	1.02242
mmu-mir-155-5p	7.43382	5.47833	6.45607	1.38274	5.33658	65.5646	35.4506	42.5876	0.182115
mmu-mir-322-3p	80.7529	61.8269	71.2899	13.3827	48.2718	65.1355	56.7036	11.9244	1.25724
mmu-mir-21-3p	19.6037	24.8304	22.217	3.6958	13.3415	64.5348	38.9381	36.1991	0.570573
mmu-mir-421-3p	54.6745	51.5105	53.0925	2.2373	31.7769	59.2141	45.4955	19.401	1.16698
mmu-mir-10b-5p	124.127	63.0719	93.5994	43.1723	66.3131	57.8839	62.0985	5.96032	1.50727
mmu-mir-429-3p	30.5746	14.016	22.2953	11.7087	12.3105	57.369	34.8398	31.8612	0.639938
mmu-mir-221-5p	32.5529	24.0477	28.3003	6.01409	23.772	57.2403	40.5062	23.6656	0.698667
mmu-mir-125b-2-3p	45.0226	41.1942	43.1084	2.70707	19.1227	56.2534	37.6881	26.2553	1.14382
mmu-mir-215-5p	2006.4	85.1868	1045.79	1358.5	164.514	55.9959	110.255	76.734	9.48523
mmu-mir-106b-5p	39.9987	46.2456	43.1222	4.41722	19.2541	53.9792	36.6167	24.5543	1.17767
mmu-mir-5105_+_7	61.6887	71.076	66.3824	6.63781	60.3094	52.3487	56.3291	5.62909	1.17847
mmu-mir-122-5p_+_4	34.0967	35.87	34.9833	1.25396	33.6265	51.7551	42.6908	12.8188	0.819458
mmu-mir-541-5p	11.3306	8.82225	10.0764	1.77366	6.12494	50.6323	28.3786	31.4715	0.35507
mmu-mir-24-2-5p	33.9318	36.285	35.1084	1.664	18.011	50.1174	34.0642	22.7027	1.03065
mmu-let-7d-3p_+_1	35.4305	35.0755	35.253	0.251025	36.2038	49.86	43.0319	9.65634	0.81923
mmu-mir-5109_-_3	23.3206	56.0995	39.7101	23.1782	122.256	49.4738	85.865	51.4649	0.462471
mmu-mir-378-5p	41.9052	43.6488	42.777	1.23292	38.2455	49.3451	43.7953	7.84859	0.976748
mmu-mir-22-5p	54.9143	44.2535	49.5839	7.53834	22.7411	49.1734	35.9573	18.6905	1.37897
mmu-mir-92a-1-5p	14.6278	12.3085	13.4681	1.64005	17.4045	48.6585	33.0315	22.0999	0.407736
mmu-mir-674-3p	36.9892	33.8305	35.4099	2.2336	25.278	48.3582	36.8181	16.3201	0.961752
mmu-mir-30e-5p_+_1	71.3607	67.7795	69.5701	2.53226	36.3352	46.4273	41.3813	7.13615	1.6812
mmu-mir-199a-2-3p_+_1	15.2673	11.0515	13.1594	2.98101	7.98466	46.0268	27.0057	26.8999	0.487282
mmu-mir-874-3p	27.3672	34.0083	30.6878	4.69596	39.4179	45.9124	42.6651	4.59227	0.719271
mmu-mir-5109_+_7	20.1782	38.5795	29.3789	13.0117	122.503	45.5977	84.0503	54.3801	0.349539
mmu-mir-126-3p_-_1	34.831	40.3404	37.5857	3.89573	26.8042	45.2258	36.015	13.0261	1.04361
mmu-mir-1249-3p	28.5962	28.9569	28.7766	0.255026	34.8091	44.5393	39.6742	6.88031	0.725322
mmu-mir-199a-1-3p_+_1	14.2482	10.1266	12.1874	2.91437	7.43887	43.7097	25.5743	25.6474	0.476548
mmu-mir-199b-3p_+_1	14.2482	10.1266	12.1874	2.91437	7.43887	43.7097	25.5743	25.6474	0.476548
mmu-mir-1948-3p	53.9551	36.9965	45.4758	11.9916	27.7138	43.5095	35.6117	11.1692	1.27699
mmu-mir-5109_+_8	19.6407	47.2832	33.4619	19.5462	84.1633	42.524	63.3437	29.4434	0.52826
mmu-mir-1843b-5p_-_1	34.4354	34.6913	34.5634	0.181002	25.5671	42.0334	33.8002	11.6435	1.02258
mmu-mir-335-5p	40.7062	36.285	38.4956	3.1262	16.7981	41.5357	29.1669	17.4921	1.31984
mmu-mir-151-5p_-_1	18.4047	14.4429	16.4238	2.80144	17.728	40.7204	29.2242	16.2581	0.561993
mmu-mir-183-5p_+_1	12.0999	11.6681	11.884	0.305335	16.2675	38.0172	27.1423	15.3793	0.437842
mmu-mir-144-3p	84.7595	191.433	138.096	75.4297	53.6892	37.631	45.6601	11.3549	3.02444
mmu-mir-106b-3p	15.3472	27.1071	21.2272	8.31545	19.709	37.2448	28.4769	12.3997	0.745417
mmu-mir-122-5p_+_3	28.5583	26.0244	27.2913	1.79168	28.4335	36.4724	32.453	5.68442	0.840951
mmu-mir-339-3p	13.8485	15.3678	14.6081	1.0743	16.0704	36.3866	26.2285	14.3658	0.556956
mmu-mir-3096b-5p	4.76604	4.69571	4.73087	0.0497282	8.45969	36.0004	22.2301	19.4743	0.212814
mmu-mir-194-2-3p	40.3465	39.0598	39.7031	0.909817	43.6629	35.4426	39.5528	5.81263	1.0038
mmu-mir-151-3p_-_2	18.045	18.4983	18.2716	0.320503	14.1298	35.3139	24.7219	14.9794	0.739088
mmu-mir-1198-5p	27.2294	28.5656	27.8975	0.944847	26.5161	34.4986	30.5074	5.64448	0.91445
mmu-mir-141-3p	24.3997	16.8263	20.613	5.35521	9.94545	34.4986	22.222	17.3617	0.927593
mmu-mir-212-5p	4.31641	6.47439	5.3954	1.52592	6.4888	34.1554	20.3221	19.5632	0.265494
mmu-mir-151-3p_+_1	19.6037	20.0279	19.8158	0.299968	20.8915	33.855	27.3733	9.16659	0.723911
mmu-mir-335-3p	23.0209	20.8461	21.9335	1.53778	12.5531	33.3401	22.9466	14.6986	0.955849
mmu-mir-1981-3p	35.2507	23.8343	29.5425	8.07261	17.3439	33.2543	25.2991	11.2504	1.16773
mmu-mir-5115_+_1	25.9284	81.6769	53.8027	39.4201	166.556	33.0827	99.8193	94.3798	0.539001
mmu-mir-361-3p	20.0833	20.1346	20.109	0.0363014	16.0097	32.0958	24.0527	11.3745	0.836036
mmu-mir-10a-5p_+_2	30.6945	23.3363	27.0154	5.20305	14.0692	32.0958	23.0825	12.7467	1.17039
mmu-mir-128-1-3p	22.1816	18.605	20.3933	2.52902	11.0977	31.5379	21.3178	14.4535	0.956631
mmu-mir-375-3p	107.371	45.1073	76.239	44.0269	88.66	31.3234	59.9917	40.5431	1.27083
mmu-mir-23b-3p_+_1	36.9892	26.9292	31.9592	7.11353	23.8024	31.023	27.4127	5.10578	1.16585
mmu-mir-21-5p_-_1	19.9634	18.9251	19.4443	0.734163	9.21773	30.9801	20.0989	15.3883	0.967428
mmu-mir-140-3p_+_2	21.9418	23.3363	22.639	0.986064	14.3926	30.8085	22.6005	11.6078	1.0017
mmu-mir-144-5p	90.0451	165.631	127.838	53.447	50.8188	30.4652	40.642	14.3922	3.14546
mmu-mir-339-5p	8.15322	12.8302	10.4917	3.30712	13.1898	29.8216	21.5057	11.7604	0.487857
mmu-mir-3096-5p_+_1	4.04664	3.13047	3.58856	0.647824	6.82233	29.5641	18.1932	16.0809	0.197247
mmu-let-7b-3p	31.5937	25.1861	28.3899	4.53089	28.0474	28.8347	28.441	0.556716	0.998203
mmu-mir-26a-1-5p_+_1	23.7802	14.1464	18.9633	6.81213	12.7755	28.7775	20.7765	11.3151	0.912731
mmu-mir-26a-2-5p_+_1	23.7802	14.1464	18.9633	6.81213	12.7755	28.7775	20.7765	11.3151	0.912731
mmu-mir-19b-2-3p	27.5171	37.625	32.5711	7.14733	16.9497	28.7689	22.8593	8.35743	1.42485
mmu-mir-365-2-3p	42.3548	39.6645	41.0097	1.9023	23.1353	28.1052	25.6203	3.51428	1.60067
mmu-mir-365-1-3p	42.2948	39.5934	40.9441	1.91022	22.9534	28.0194	25.4864	3.58224	1.60651
mmu-mir-101b-3p_+_1	50.3057	43.6517	46.9787	4.70505	21.3564	27.9408	24.6486	4.65582	1.90594
mmu-mir-19b-1-3p	25.8385	36.8068	31.3227	7.75574	16.2826	27.6533	21.9679	8.04025	1.42583
mmu-mir-192-5p_-_1	85.1892	71.1471	78.1682	9.92922	34.0207	27.4616	30.7412	4.63798	2.54279
mmu-mir-224-5p	7.25397	2.49015	4.87206	3.36853	2.60765	27.3758	14.9917	17.5137	0.324983
mmu-mir-30c-1-3p	26.2582	19.103	22.6806	5.05946	19.4057	27.0754	23.2406	5.42328	0.975904
mmu-mir-320-3p_+_1	14.6278	13.6603	14.144	0.684188	17.8897	26.8609	22.3753	6.3436	0.632128
mmu-mir-185-5p	38.6679	27.4272	33.0475	7.94833	21.5889	26.6034	24.0962	3.54581	1.37149
mmu-mir-5105_+_6	15.8268	60.1905	38.0087	31.3698	67.2834	26.0027	46.643	29.1898	0.814884
mmu-mir-411-5p	6.77437	5.90521	6.33979	0.614586	4.79079	25.9169	15.3538	14.9384	0.412912
mmu-mir-99b-5p_+_1	5.99502	4.9803	5.48766	0.717513	7.7623	25.6594	16.7109	12.6552	0.328389
mmu-mir-5115_-_4	8.87262	40.6013	24.737	22.4356	28.9924	25.402	27.1972	2.5388	0.909541
mmu-mir-145-3p_-_1	16.1865	13.6247	14.9056	1.81151	9.15709	25.1445	17.1508	11.3048	0.869091
mmu-mir-212-3p	2.75771	3.7708	3.26425	0.716364	3.27472	24.8013	14.038	15.2216	0.23253
mmu-mir-122-5p_+_1	16.3364	13.9093	15.1228	1.71626	13.3718	24.5009	18.9363	7.86948	0.798615
mmu-mir-187-3p	17.2656	18.7828	18.0242	1.07282	11.6434	24.458	18.0507	9.06125	0.998533
mmu-mir-532-3p	10.9509	13.1622	12.0566	1.56364	10.9764	24.2578	17.6171	9.39135	0.684368
mmu-mir-122-5p_+_6	17.4095	16.9621	17.1858	0.316398	17.5056	24.1251	20.8154	4.68072	0.82563
mmu-mir-22-3p_-_1	28.5363	24.4035	26.4699	2.92234	14.7362	24.0289	19.3826	6.57091	1.36565
mmu-mir-193b-3p	5.63532	7.13843	6.38687	1.06286	11.3402	23.8573	17.5988	8.85088	0.362916
mmu-mir-125b-1-3p	5.45546	6.3321	5.89378	0.619872	5.51851	23.5998	14.5592	12.7854	0.404816
mmu-mir-802-5p_+_1	33.7519	30.7356	32.2438	2.1329	14.615	23.2565	18.9358	6.11053	1.7028
mmu-mir-214-5p	3.41716	3.84195	3.62955	0.300369	2.97151	23.2565	13.114	14.3437	0.276769
mmu-mir-122-5p_+_2	16.7761	12.3085	14.5423	3.15907	10.9006	22.098	16.4993	7.91778	0.881387
mmu-mir-338-3p	27.1574	20.6327	23.895	4.6137	12.3408	21.7976	17.0692	6.68697	1.39989
mmu-let-7d-5p_-_1	16.4863	15.1543	15.8203	0.941833	9.8848	21.7118	15.7983	8.36297	1.00139
mmu-mir-582-3p_+_1	0.659452	0	0.329726	0.466303	0	21.5402	10.7701	15.2312	0.0306149
mmu-mir-142-3p_+_3	10.1316	17.4311	13.7813	5.16151	8.49001	21.4544	14.9722	9.16719	0.92046
mmu-mir-130b-3p	10.9709	13.0555	12.0132	1.47405	6.39783	21.1969	13.7974	10.4645	0.870686
mmu-mir-1981-5p	17.0258	15.1543	16.0901	1.32335	15.0395	20.7678	17.9036	4.05058	0.898705
mmu-mir-5115_+_3	15.1074	44.3425	29.7249	20.6723	42.8018	20.5318	31.6668	15.7472	0.938678
mmu-mir-872-3p	17.5654	17.1465	17.3559	0.296232	8.97516	20.5104	14.7428	8.15664	1.17725
mmu-mir-192-3p	35.4905	36.9965	36.2435	1.06492	20.3457	19.9955	20.1706	0.247652	1.79685
mmu-mir-27b-5p	14.5079	10.6009	12.5544	2.76268	8.49001	19.9955	14.2427	8.13559	0.881461
mmu-mir-361-3p_+_1	13.3089	12.593	12.951	0.506212	11.7041	19.4806	15.5923	5.4988	0.8306
mmu-mir-322-3p_-_2	24.5796	17.2176	20.8986	5.20569	13.0989	19.3948	16.2468	4.45186	1.28632
mmu-mir-1843-5p_+_1	17.5054	20.8817	19.1936	2.38736	11.0977	18.9142	15.0059	5.52711	1.27907
mmu-mir-122-5p_+_5	11.5674	10.0673	10.8174	1.0607	11.3975	18.8707	15.1341	5.28432	0.714768
mmu-let-7g-5p_-_1	20.9526	13.1464	17.0495	5.5198	12.3712	18.8369	15.6041	4.572	1.09263
mmu-mir-142-3p	10.2515	15.9512	13.1013	4.03031	5.33658	18.794	12.0653	9.51586	1.08587
mmu-mir-26b-3p	14.6478	11.9527	13.3003	1.90573	10.0667	18.7368	14.4018	6.13068	0.923516
mmu-mir-200b-3p_+_1	5.21566	4.19768	4.70667	0.719822	3.82051	18.7082	11.2644	10.5272	0.417837
mmu-mir-1843b-5p	17.4455	20.4548	18.9502	2.1279	11.0977	18.5709	14.8343	5.28438	1.27746
mmu-mir-3096b-5p_-_1	4.13656	3.87752	4.00704	0.18317	7.26199	18.4508	12.8564	7.91166	0.311677
mmu-mir-350-5p	6.65447	7.89733	7.2759	0.878838	11.0977	18.3649	14.7313	5.13875	0.493907
mmu-mir-674-5p	10.9169	10.3128	10.6149	0.427196	11.5828	18.3564	14.9696	4.78963	0.709095
mmu-mir-345-5p_-_1	15.3472	20.3481	17.8477	3.53613	12.3105	18.1933	15.2519	4.15976	1.17019
mmu-mir-5109_-_4	8.93257	22.945	15.9388	9.90825	49.7272	18.0217	33.8745	22.4192	0.470525
mmu-mir-125a-5p_+_1	4.94589	3.13047	4.03818	1.28369	5.76108	17.9359	11.8485	8.60887	0.340819
mmu-mir-17-3p	8.03332	10.2926	9.16297	1.59757	6.97394	17.0062	11.9901	7.09386	0.764214
mmu-mir-184-3p	6.05497	6.90127	6.47812	0.598429	9.21773	16.6486	12.9332	5.25442	0.500892
mmu-mir-10a-3p	16.7261	11.099	13.9125	3.97899	7.15587	16.6486	11.9022	6.71237	1.1689
mmu-mir-411-5p_-_1	5.87512	4.12653	5.00083	1.23643	2.85022	16.6486	9.74941	9.75693	0.512936
mmu-mir-34c-5p	2.84763	2.88146	2.86455	0.0239191	2.3954	16.4341	9.41473	9.92683	0.304262
mmu-mir-1843b-3p_-_1	11.4505	15.0832	13.2668	2.56872	10.0667	16.3911	13.2289	4.47204	1.00286
mmu-mir-142-5p_-_3	11.0908	11.8104	11.4506	0.508867	4.30565	16.1337	10.2197	8.36369	1.12045
mmu-mir-92a-1-3p_+_2	7.16404	5.69177	6.42791	1.04105	8.55066	15.7904	12.1705	5.11929	0.528153
mmu-mir-1964-3p	7.49377	6.3321	6.91293	0.821428	6.79201	15.533	11.1625	6.18079	0.6193
mmu-mir-511-3p	16.6062	11.8816	14.2439	3.34081	10.4912	15.4472	12.9692	3.50436	1.09829
mmu-mir-324-5p	5.45546	8.11077	6.78312	1.87759	7.88358	15.4472	11.6654	5.34825	0.581475
mmu-mir-1843b-5p_-_2	16.6961	14.4784	15.5873	1.56813	11.4615	15.2755	13.3685	2.6969	1.16597
mmu-mir-148a-3p_+_1	18.8843	14.7986	16.8415	2.88902	9.33902	15.2755	12.3073	4.19774	1.36842
mmu-mir-99b-3p	3.59701	4.9803	4.28865	0.978134	4.91208	15.2755	10.0938	7.32806	0.42488
mmu-mir-664-3p	15.2873	14.0871	14.6872	0.848639	9.76352	14.9322	12.3479	3.65484	1.18945
mmu-mir-30d-3p	19.3639	16.8974	18.1307	1.74405	9.52094	14.7606	12.1408	3.705	1.49337
mmu-mir-128-2-3p	10.6711	9.92503	10.2981	0.527574	6.42815	14.7177	10.5729	5.8616	0.974004
mmu-mir-5105_-_2	10.851	14.2294	12.5402	2.38892	36.689	14.589	25.639	15.6271	0.489107
mmu-mir-5105_-_8	11.99	16.933	14.4615	3.49522	38.8418	14.1599	26.5009	17.4528	0.5457
mmu-mir-374-5p	16.831	12.7353	14.7832	2.89608	8.67194	13.9883	11.3301	3.7592	1.30477
mmu-mir-324-3p_+_2	7.91342	9.10683	8.51013	0.843871	9.82416	13.9024	11.8633	2.88378	0.717349
mmu-mir-434-3p	4.37636	3.91309	4.14473	0.327581	2.97151	13.8166	8.39406	7.66865	0.493769
mmu-mir-5115_+_4	8.81267	28.3877	18.6002	13.8416	33.3839	13.5592	23.4716	14.0182	0.792457
mmu-mir-195-3p	4.55621	5.19374	4.87498	0.450801	6.18558	13.5592	9.87237	5.21391	0.4938
mmu-mir-29b-2-3p	19.0262	21.8777	20.452	2.01636	8.8943	13.5306	11.2124	3.27833	1.82404
mmu-mir-3096-5p	3.11741	2.52572	2.82157	0.418384	4.95756	13.3875	9.17255	5.96089	0.30761
mmu-mir-5109_-_5	7.34389	19.8145	13.5792	8.81804	31.4434	13.173	22.3082	12.9191	0.608709
mmu-mir-223-5p	1.85845	2.84589	2.35217	0.698219	1.45543	13.0443	7.24985	8.19454	0.324444
mmu-mir-101c_-_1	12.9843	21.7243	17.3543	6.18015	9.81723	12.9823	11.3998	2.23803	1.52234
mmu-mir-29b-1-3p	18.2468	21.522	19.8844	2.3159	8.8943	12.9298	10.9121	2.85356	1.82224
mmu-mir-100-5p_+_1	3.62698	3.6285	3.62774	0.00107454	2.8199	12.7439	7.7819	7.01733	0.466177
mmu-mir-5109_+_2	8.37304	20.0279	14.2005	8.24125	32.8048	12.6123	22.7086	14.2783	0.625336
mmu-mir-140-5p	11.7502	12.8776	12.3139	0.797193	4.50779	12.4721	8.48997	5.63165	1.45041
mmu-mir-455-5p	16.9059	14.3006	15.6033	1.84227	12.5531	12.1918	12.3725	0.255467	1.26113
mmu-mir-342-5p	3.77686	4.26883	4.02284	0.347874	3.33536	12.1003	7.71782	6.19773	0.521241
mmu-mir-210-3p	11.8701	12.8776	12.3739	0.712411	7.51973	12.0145	9.76709	3.17825	1.2669
mmu-mir-342-3p_+_2	3.41716	5.26489	4.34102	1.30654	1.94057	11.9286	6.9346	7.06262	0.625994
mmu-mir-122-5p_-_1	12.4297	9.75902	11.0943	1.88843	10.3699	11.757	11.0635	0.980795	1.00279
mmu-mir-106b-3p_-_2	3.89676	7.47045	5.68361	2.52698	5.21529	11.6712	8.44324	4.565	0.673155
mmu-mir-5115_+_5	7.85347	25.613	16.7332	12.5579	34.4452	11.4137	22.9295	16.2857	0.729769
mmu-mir-30a-5p_+_2	13.8185	11.099	12.4587	1.92302	7.64101	11.4137	9.52737	2.66771	1.30768
mmu-mir-30b-3p	7.43382	6.68783	7.06083	0.527493	5.88237	11.0705	8.47641	3.66854	0.832997
mmu-mir-5109_+_1	5.43548	13.1029	9.26921	5.42171	35.6176	11.0419	23.3297	17.3777	0.397313
mmu-mir-1947-5p	9.47213	9.53372	9.50292	0.0435521	4.91208	10.9846	7.94836	4.29395	1.19558
mmu-mir-5109_-_6	7.91342	18.4627	13.1881	7.45946	31.2614	10.8988	21.0801	14.3985	0.625615
mmu-mir-5105_+_1	7.31392	17.7156	12.5148	7.35513	29.1693	10.8988	20.034	12.9192	0.624676
mmu-mir-340-3p	13.4288	12.9488	13.1888	0.339451	5.15465	10.8988	8.02674	4.06174	1.64311
mmu-mir-5105_+_5	7.73357	19.2809	13.5072	8.16518	17.4045	10.813	14.1088	4.66091	0.957364
mmu-mir-142-3p_+_1	4.25646	7.61274	5.9346	2.37325	2.78958	10.6414	6.71547	5.55206	0.883721
mmu-mir-10b-5p_+_1	19.1241	9.10683	14.1155	7.08328	13.8872	10.5126	12.1999	2.3862	1.15701
mmu-mir-152-5p	8.69277	13.0199	10.8564	3.05976	6.42815	10.4697	8.44895	2.85783	1.28494
mmu-mir-582-3p	0	0	0	0	0	10.4697	5.23487	7.40322	0
mmu-mir-193-3p	17.7153	20.1406	18.9279	1.71494	12.5834	10.3839	11.4837	1.55528	1.64825
mmu-mir-1843-3p	8.51292	9.10683	8.80988	0.419959	9.15709	10.3839	9.7705	0.867501	0.901681
mmu-mir-1843-5p_-_1	13.6986	15.1188	14.4087	1.0042	9.85448	10.341	10.0977	0.344028	1.42692
mmu-mir-5109_-_8	6.23482	13.4587	9.84674	5.10803	20.1638	10.1694	15.1666	7.06711	0.649239
mmu-mir-5105_-_3	7.67362	7.32816	7.50089	0.24428	25.4094	10.1265	17.7679	10.8067	0.422159
mmu-mir-143-5p	3.47711	3.48621	3.48166	0.00643519	4.66951	10.0406	7.35508	3.79797	0.473368
mmu-mir-25-5p	3.29726	4.05539	3.67632	0.536078	4.5179	9.95483	7.23637	3.84449	0.508034
mmu-mir-125b-2-3p_-_2	6.65447	7.96848	7.31147	0.929147	4.42694	9.95483	7.19088	3.90881	1.01677
mmu-mir-24-1-3p_+_1	4.37636	3.84195	4.10915	0.377889	3.22418	9.82611	6.52514	4.66826	0.629741
mmu-mir-24-2-3p_+_1	4.37636	3.84195	4.10915	0.377889	3.22418	9.82611	6.52514	4.66826	0.629741
mmu-mir-27b-3p_+_1	6.14489	4.12653	5.13571	1.42719	2.06186	9.82611	5.94398	5.49015	0.864019
mmu-mir-148b-5p	9.65198	10.2452	9.94858	0.419465	6.36751	9.69738	8.03245	2.35457	1.23855
mmu-mir-32-5p	14.5679	10.6009	12.5844	2.80507	4.73015	9.65447	7.19231	3.48202	1.7497
mmu-mir-181c-3p	3.83681	3.6285	3.73266	0.147295	1.698	9.61156	5.65478	5.59573	0.660089
mmu-mir-455-3p_+_1	16.4263	12.095	14.2607	3.06271	24.803	9.52574	17.1644	10.8026	0.830831
mmu-mir-345-3p	8.51292	7.47045	7.99169	0.73714	6.42815	9.52574	7.97695	2.19033	1.00185
mmu-mir-142-5p_+_1	3.39718	8.32422	5.8607	3.48394	2.20336	9.45709	5.83023	5.12916	1.00523
mmu-mir-5115_+_2	4.37636	20.7726	12.5745	11.5939	62.7311	9.45423	36.0927	37.6724	0.348394
mmu-mir-671-5p	6.65447	6.40324	6.52886	0.177643	4.30565	9.3255	6.81558	3.54957	0.957931
mmu-mir-486-3p	13.3689	28.3166	20.8427	10.5696	17.0104	9.18247	13.0964	5.53514	1.59148
mmu-mir-5105_+_3	9.41218	13.6603	11.5362	3.00384	23.0443	9.01084	16.0276	9.92317	0.719773
mmu-mir-200c-3p	8.51292	4.4467	6.47981	2.87526	5.21529	9.01084	7.11307	2.68386	0.910973
mmu-mir-125a-3p	2.99751	2.27671	2.63711	0.509682	4.66951	8.92502	6.79726	3.0091	0.387966
mmu-let-7c-2-3p	11.4505	10.4586	10.9546	0.701344	4.45726	8.8392	6.64823	3.0985	1.64774
mmu-let-7a-1-3p	11.5104	10.3875	10.949	0.794044	4.45726	8.8392	6.64823	3.0985	1.6469
mmu-mir-194-2-5p_-_1	19.3939	13.0199	16.2069	4.50706	8.88419	8.75339	8.81879	0.0924947	1.83777
mmu-mir-148a-5p_-_1	7.85347	8.39536	8.12442	0.383175	5.51851	8.75339	7.13595	2.2874	1.13852
mmu-mir-205-5p	2.57786	1.77868	2.17827	0.565104	2.1225	8.75339	5.43795	4.68874	0.400568
mmu-mir-5109_-_7	6.08494	18.5694	12.3272	8.82785	21.8315	8.71048	15.271	9.27794	0.807229
mmu-mir-486-5p_+_2	13.3189	34.1981	23.7585	14.7638	20.0425	8.71048	14.3765	8.01295	1.65259
mmu-mir-378-3p_-_1	9.3872	5.30046	7.34383	2.88976	4.50779	8.55315	6.53047	2.8605	1.12455
mmu-mir-664-5p	6.29477	6.97242	6.63359	0.479173	5.15465	8.49593	6.82529	2.36264	0.971913
mmu-mir-425-3p_-_1	7.55372	5.90521	6.72947	1.16567	4.91208	8.23848	6.57528	2.35212	1.02345
mmu-let-7i-3p	2.03831	3.48621	2.76226	1.02382	4.48758	8.15266	6.32012	2.59161	0.437058
mmu-mir-3102-3p	0.899252	0.853766	0.876509	0.0321639	1.51607	8.06685	4.79146	4.6321	0.182932
mmu-mir-874-5p	5.03581	5.33604	5.18592	0.212289	4.73015	7.98103	6.35559	2.29872	0.815963
mmu-mir-5105_+_2	6.77437	14.3006	10.5375	5.32183	24.4391	7.89521	16.1672	11.6983	0.651782
mmu-mir-423-3p_+_1	5.03581	4.90915	4.97248	0.0895625	4.91208	7.80939	6.36074	2.04871	0.781746
mmu-mir-151-3p_+_2	4.85596	3.7708	4.31338	0.767327	4.03276	7.80939	5.92108	2.67049	0.728479
mmu-mir-5109_+_6	4.60617	9.99078	7.29848	3.8075	21.4535	7.74503	14.5992	9.69332	0.499922
mmu-mir-322-3p_-_1	10.3114	6.1898	8.25061	2.91443	4.73015	7.72358	6.22686	2.11667	1.325
mmu-mir-186-5p_+_1	8.21317	6.97242	7.5928	0.877344	3.21408	7.72358	5.46883	3.1887	1.38838
mmu-mir-3096b-5p_+_1	0.989178	1.52966	1.25942	0.382181	2.88054	7.48758	5.18406	3.25767	0.242941
mmu-mir-181a-1-3p	7.5837	7.47045	7.52707	0.0800765	3.51729	7.42322	5.47025	2.7619	1.376
mmu-mir-676-5p	7.49377	7.89733	7.69555	0.285362	2.60765	7.29449	4.95107	3.3141	1.55432
mmu-mir-3057-5p	5.39551	3.91309	4.6543	1.04823	7.94423	7.20867	7.57645	0.520117	0.614312
mmu-mir-181a-1-5p_+_1	2.81766	2.34786	2.58276	0.3322	2.45604	7.20867	4.83236	3.36062	0.534472
mmu-mir-181a-2-5p_+_1	2.81766	2.34786	2.58276	0.3322	2.45604	7.20867	4.83236	3.36062	0.534472
mmu-mir-700-3p	2.51791	2.63244	2.57518	0.0809903	2.85022	7.12285	4.98654	3.02121	0.516426
mmu-mir-30d-5p_+_1	5.7752	3.10676	4.44098	1.88687	3.67901	7.03704	5.35802	2.37449	0.828847
mmu-mir-99a-5p_-_1	4.25646	4.33998	4.29822	0.0590536	3.15343	7.03704	5.09524	2.74612	0.843576
mmu-mir-130a-3p_+_1	3.95671	6.04751	5.00211	1.47842	3.33536	6.95122	5.14329	2.5568	0.97255
mmu-mir-330-3p_+_1	5.15571	4.41112	4.78342	0.526505	4.21469	6.77958	5.49713	1.81366	0.870166
mmu-mir-320-3p_+_2	3.71691	2.63244	3.17468	0.766833	4.15404	6.77958	5.46681	1.85654	0.580718
mmu-mir-96-5p	3.95671	4.41112	4.18392	0.321318	3.82051	6.77958	5.30005	2.09238	0.789412
mmu-mir-5117-3p_-_4	2.27811	2.63244	2.45528	0.250555	3.21408	6.69377	4.95392	2.46051	0.495623
mmu-mir-345-5p	4.49626	4.83801	4.66713	0.241649	3.15343	6.69377	4.9236	2.50339	0.947911
mmu-mir-500-3p	3.11741	3.91309	3.51525	0.562634	3.09279	6.69377	4.89328	2.54627	0.718384
mmu-mir-30e-3p_+_1	11.6303	7.07914	9.35474	3.21818	5.27594	6.65086	5.9634	0.972215	1.56869
mmu-mir-3105-3p	10.4313	9.17798	9.80465	0.88625	4.36629	6.52213	5.44421	1.52441	1.80093
mmu-mir-547-3p	3.23731	2.34786	2.79258	0.628938	2.42572	6.52213	4.47392	2.8966	0.624191
mmu-mir-1948-3p_+_1	6.83432	3.41506	5.12469	2.41778	4.00244	6.43631	5.21937	1.72101	0.981859
mmu-mir-5126_-_1	2.61283	4.75856	3.68569	1.51726	10.3442	6.35479	8.34952	2.82097	0.441426
mmu-mir-324-3p	1.5587	2.91703	2.23787	0.960483	3.69922	6.3505	5.02486	1.87473	0.44536
mmu-mir-877-5p	3.65696	3.05933	3.35814	0.42259	3.27472	6.3505	4.81261	2.1749	0.69778
mmu-mir-18a-5p	3.83681	5.12259	4.4797	0.909187	1.87993	6.3505	4.11521	3.16117	1.08857
mmu-mir-450a-1-5p	7.22399	5.79849	6.51124	1.00798	4.48758	6.30759	5.39758	1.28694	1.20633
mmu-mir-450a-2-5p	7.22399	5.15817	6.19108	1.46076	4.48758	6.30759	5.39758	1.28694	1.14701
mmu-mir-511-5p_-_1	3.89676	3.27277	3.58476	0.441229	2.97151	6.26468	4.61809	2.32863	0.776244
mmu-mir-3096-5p_+_2	0.629477	1.10278	0.866129	0.334676	2.03154	6.20032	4.11593	2.94777	0.210433
mmu-mir-1843b-3p_-_3	4.01666	6.04751	5.03208	1.43603	2.97151	6.17886	4.57518	2.26794	1.09987
mmu-let-7e-3p	1.91841	2.13441	2.02641	0.152742	2.66829	6.17886	4.42358	2.48235	0.458093
mmu-let-7f-1-3p	7.79352	6.68783	7.24068	0.78184	3.79019	6.09304	4.94161	1.62837	1.46525
mmu-mir-200b-5p	2.03831	0.782619	1.41046	0.887905	0.667073	6.03583	3.35145	3.79629	0.420851
mmu-mir-15b-3p	5.93507	7.3993	6.66718	1.03537	2.36508	5.92141	4.14324	2.51471	1.60917
mmu-mir-5122_-_1	3.89676	2.98818	3.44247	0.642463	4.60887	5.83559	5.22223	0.867426	0.659196
mmu-mir-22-3p_+_2	9.29227	3.69965	6.49596	3.95458	3.82051	5.83559	4.82805	1.42488	1.34546
mmu-mir-542-3p	6.71442	6.3321	6.52326	0.270343	2.91086	5.83559	4.37323	2.0681	1.49163
mmu-mir-330-5p	4.77603	5.12259	4.94931	0.245058	3.15343	5.82486	4.48915	1.88899	1.10251
mmu-let-7c-1-5p_-_1	3.04747	3.5534	3.30044	0.357752	4.03276	5.79268	4.91272	1.24446	0.671814
mmu-mir-129-1-5p	1.0791	0.924913	1.00201	0.109029	1.39479	5.79268	3.59374	3.10978	0.278821
mmu-mir-29a-3p_+_5	2.87761	2.70359	2.7906	0.123048	2.30443	5.74977	4.0271	2.43622	0.692955
mmu-mir-129-2-5p	1.0791	0.924913	1.00201	0.109029	1.39479	5.70686	3.55083	3.0491	0.28219
mmu-mir-145-3p_-_2	4.01666	2.20556	3.11111	1.28064	1.45543	5.66396	3.55969	2.97588	0.873983
mmu-let-7f-2-5p_-_1	5.49543	3.91309	4.70426	1.11888	2.09218	5.60674	3.84946	2.48517	1.22206
mmu-mir-21-3p_+_1	3.77686	4.05539	3.91612	0.196948	1.63736	5.57814	3.60775	2.78655	1.08548
mmu-mir-5105_-_7	4.31641	5.40718	4.8618	0.771292	11.2189	5.49232	8.35563	4.04934	0.581859
mmu-mir-192-5p_+_2	9.32225	4.76686	7.04455	3.22115	4.82112	5.49232	5.15672	0.474614	1.36609
mmu-mir-345-3p_-_1	4.37636	4.83801	4.60718	0.326432	3.82051	5.49232	4.65641	1.18215	0.989427
mmu-mir-210-5p	4.01666	3.27277	3.64471	0.526011	3.27472	5.49232	4.38352	1.56808	0.831458
mmu-mir-125b-2-3p_-_3	2.51791	2.84589	2.6819	0.231916	2.00122	5.49232	3.74677	2.46858	0.715789
mmu-mir-127-3p_-_1	0.779352	0	0.389676	0.551085	0.909644	5.49232	3.20098	3.24044	0.121736
mmu-mir-5105_+_4	2.54788	4.73129	3.63958	1.5439	7.67133	5.4065	6.53892	1.60148	0.556603
mmu-mir-219-1-3p	4.13656	3.91309	4.02483	0.158016	2.60765	5.4065	4.00708	1.97909	1.00443
mmu-let-7c-1-5p_+_1	2.50292	2.86367	2.6833	0.255091	2.45604	5.36359	3.90982	2.05595	0.686297
mmu-mir-5099_-_1	2.21816	2.06327	2.14071	0.109523	4.00244	5.32069	4.66156	0.932144	0.459226
mmu-mir-486-5p_-_1	8.5429	25.7197	17.1313	12.1458	13.5537	5.23487	9.39429	5.8823	1.82359
mmu-mir-3068-3p	3.35721	4.05539	3.7063	0.493687	2.00122	5.23487	3.61804	2.28654	1.02439
mmu-mir-700-5p	1.97836	3.20162	2.58999	0.86498	1.51607	5.23487	3.37547	2.62958	0.767297
mmu-mir-132-5p_+_1	1.6786	1.63638	1.65749	0.0298542	0.970287	5.23487	3.10258	3.01551	0.534231
mmu-let-7c-2-5p_+_1	2.68277	3.14826	2.91552	0.329152	2.51668	5.19196	3.85432	1.89171	0.756428
mmu-mir-298-5p	1.5587	1.06721	1.31296	0.347541	1.33415	5.19196	3.26305	2.72789	0.40237
mmu-mir-28-3p_+_1	2.03831	2.63244	2.33537	0.42012	1.81929	5.14905	3.48417	2.3545	0.670282
mmu-mir-93-3p	2.33806	2.70359	2.52082	0.258472	1.63736	5.14905	3.39321	2.48314	0.742903
mmu-mir-21-3p_+_2	1.73855	2.06327	1.90091	0.229606	1.33415	5.14905	3.2416	2.69755	0.586412
mmu-mir-5105_-_6	3.53706	4.41112	3.97409	0.618056	8.85387	5.06323	6.95855	2.68039	0.571109
mmu-mir-362-5p	1.7985	1.63638	1.71744	0.114637	1.63736	5.06323	3.3503	2.42246	0.512625
mmu-mir-346-5p	0	0.853766	0.426883	0.603704	1.15222	5.06323	3.10772	2.76551	0.137362
mmu-mir-222-3p_-_1	2.99751	2.63244	2.81498	0.258139	2.30443	4.8916	3.59802	1.8294	0.782369
mmu-mir-673-5p	0.959203	0	0.479601	0.678259	0.849001	4.8916	2.8703	2.85855	0.167091
mmu-mir-582-5p	0	0	0	0	0	4.8916	2.4458	3.45888	0
mmu-mir-143-3p_+_3	2.51191	2.18185	2.34688	0.233392	1.46554	4.85155	3.15854	2.39427	0.743025
mmu-mir-29a-3p_+_4	5.09576	4.41112	4.75344	0.484114	3.36568	4.80578	4.08573	1.0183	1.16342
mmu-mir-152-5p_+_1	3.59701	5.47833	4.53767	1.33029	3.39601	4.71996	4.05798	0.936179	1.11821
mmu-mir-99a-5p_+_4	5.75522	3.13047	4.44284	1.85597	2.1225	4.71996	3.42123	1.83668	1.29861
mmu-mir-18a-3p	2.21816	3.55736	2.88776	0.946958	1.09157	4.71996	2.90577	2.56566	0.993801
mmu-mir-191-3p	3.11741	1.42294	2.27018	1.19817	0.909644	4.71996	2.8148	2.6943	0.806513
mmu-mir-130b-5p	1.25895	1.28065	1.2698	0.0153408	0.909644	4.71996	2.8148	2.6943	0.451115
mmu-mir-5105_-_4	3.65696	4.33998	3.99847	0.482965	5.94301	4.63415	5.28858	0.925507	0.756057
mmu-mir-3068-3p_+_1	4.85596	4.12653	4.49125	0.515784	1.39479	4.63415	3.01447	2.29057	1.4899
mmu-mir-223-3p_+_1	1.73855	1.95655	1.84755	0.154143	1.2735	4.59124	2.93237	2.34599	0.630054
mmu-mir-1968-5p	4.79601	5.19374	4.99488	0.281237	4.18436	4.54833	4.36635	0.257361	1.14395
mmu-mir-1843b-3p_-_2	4.07661	3.27277	3.67469	0.568402	2.24379	4.54833	3.39606	1.62955	1.08205
mmu-mir-7a-1-5p	10.4913	6.79455	8.64292	2.61398	2.1225	4.54833	3.33542	1.71532	2.59126
mmu-mir-3107-5p_-_1	7.22399	22.945	15.0845	11.1164	11.8557	4.46251	8.1591	5.22777	1.84879
mmu-mir-30e-5p_+_2	6.53457	5.97636	6.25546	0.394712	2.78958	4.46251	3.62604	1.18294	1.72515
mmu-mir-19a-3p	5.99502	7.24515	6.62008	0.883979	2.30443	4.4053	3.35487	1.48554	1.97328
mmu-mir-144-3p_-_1	8.96255	23.3363	16.1494	10.1638	6.54944	4.37669	5.46307	1.53636	2.95611
mmu-mir-23a-3p_-_1	2.33806	1.77868	2.05837	0.39554	1.51607	4.37669	2.94638	2.02276	0.698608
mmu-mir-181a-2-3p_-_4	0	0	0	0	0	4.37669	2.18835	3.09479	0
mmu-mir-409-5p	0	0	0	0	0	4.37669	2.18835	3.09479	0
mmu-mir-5105_-_1	3.29726	7.25701	5.27713	2.79997	14.6756	4.29088	9.48324	7.34311	0.55647
mmu-mir-338-5p	2.87761	1.92097	2.39929	0.676443	2.72893	4.29088	3.5099	1.10446	0.683577
mmu-mir-5099_+_3	2.35005	1.79647	2.07326	0.391441	2.00122	4.29088	3.14605	1.61903	0.659004
mmu-mir-148a-3p_+_2	7.97337	5.33604	6.6547	1.86488	3.09279	4.22651	3.65965	0.801662	1.8184
mmu-mir-1839-3p	5.51541	5.47833	5.49687	0.0262228	2.18315	4.20506	3.1941	1.42971	1.72094
mmu-mir-425-3p	3.23731	2.06327	2.65029	0.830173	2.18315	4.20506	3.1941	1.42971	0.829744
mmu-mir-7a-2-5p	9.83183	6.50996	8.17089	2.34891	1.94057	4.20506	3.07282	1.60123	2.65909
mmu-mir-99b-5p_-_1	0	0.782619	0.391309	0.553395	1.698	4.20506	2.95153	1.77276	0.132578
mmu-mir-434-5p	0.659452	0.924913	0.792182	0.187709	0.727716	4.20506	2.46639	2.45885	0.321191
mmu-mir-339-3p_+_2	1.4388	1.63638	1.53759	0.13971	1.33415	4.11924	2.72669	1.96936	0.563904
mmu-mir-1964-3p_-_1	1.85845	1.84983	1.85414	0.00610179	2.91086	4.03342	3.47214	0.793771	0.534005
mmu-mir-501-3p_+_1	1.7985	0	0.899252	1.27173	1.94057	4.03342	2.987	1.47987	0.301055
mmu-mir-574-5p	2.83671	1.79166	2.31419	0.738963	0	4.02416	2.01208	2.84551	1.15015
mmu-mir-5099_+_1	2.1682	1.84983	2.00901	0.225123	2.1124	3.99051	3.05146	1.32803	0.658378
mmu-mir-1306-5p_+_2	1.37885	2.63244	2.00565	0.886422	2.80979	3.94761	3.3787	0.804557	0.593616
mmu-mir-126-5p_+_1	8.45297	5.12259	6.78778	2.35493	2.78958	3.94761	3.36859	0.818851	2.01502
mmu-mir-30c-2-3p_+_1	3.35721	3.13047	3.24384	0.160326	2.78958	3.94761	3.36859	0.818851	0.962967
mmu-mir-199b-5p	0	0	0	0	0.626644	3.919	2.27282	2.32805	0
mmu-mir-582-5p_+_1	0	0	0	0	0	3.86179	1.93089	2.7307	0
mmu-mir-92a-2-3p_+_1	2.69776	2.27671	2.48723	0.297726	2.69861	3.73306	3.21584	0.731467	0.773433
mmu-mir-22-3p_+_4	5.03581	3.16605	4.10093	1.32212	2.57733	3.73306	3.15519	0.817229	1.29974
mmu-mir-99a-3p	3.53706	4.83801	4.18753	0.919908	4.30565	3.69015	3.9979	0.435222	1.04743
mmu-mir-187-5p	2.21816	2.06327	2.14071	0.109523	2.85022	3.69015	3.27019	0.593923	0.654615
mmu-mir-450b-5p	5.99502	3.7708	4.88291	1.57276	1.39479	3.69015	2.54247	1.62307	1.92054
mmu-mir-702	2.45796	0.782619	1.62029	1.18464	1.2735	3.69015	2.48183	1.70883	0.652861
mmu-mir-5102_-_3	3.54206	2.82217	3.18211	0.509036	15.3073	3.69015	9.49872	8.21456	0.335004
mmu-mir-5099	1.22898	2.02769	1.62834	0.564777	2.75925	3.60434	3.1818	0.597562	0.511766
mmu-mir-31-3p	1.5587	2.27671	1.91771	0.507706	0.727716	3.60434	2.16603	2.03408	0.885357
mmu-mir-379-5p	0	0	0	0	0	3.60434	1.80217	2.54865	0
mmu-mir-877-3p	2.6478	3.30834	2.97807	0.467075	2.04165	3.57573	2.80869	1.08476	1.06031
mmu-mir-3107-5p_+_2	5.76521	14.5614	10.1633	6.21988	8.21712	3.56143	5.88927	3.29207	1.72574
mmu-mir-148a-3p_-_1	4.43631	2.91703	3.67667	1.07429	2.00122	3.51852	2.75987	1.07289	1.33219
mmu-mir-21-5p_+_1	2.69776	2.5613	2.62953	0.0964918	1.03093	3.51852	2.27472	1.75899	1.15598
mmu-mir-136-3p_-_1	1.73855	1.3518	1.54518	0.27348	0	3.51852	1.75926	2.48797	0.87831
mmu-mir-5105_-_5	1.0791	3.91309	2.4961	2.00393	3.82051	3.4327	3.6266	0.27422	0.688274
mmu-mir-5117-5p	0.839302	0	0.419651	0.593476	1.2735	3.4327	2.3531	1.52678	0.17834
mmu-mir-362-3p	1.5587	2.27671	1.91771	0.507706	1.03093	3.4327	2.23182	1.69831	0.859258
mmu-mir-378b_-_1	3.44242	3.86448	3.65345	0.298436	1.88499	3.35403	2.61951	1.03877	1.39471
mmu-mir-193-5p	4.31641	4.62456	4.47049	0.217897	4.00244	3.34688	3.67466	0.463545	1.21657
mmu-mir-30d-3p_+_1	6.74439	4.76686	5.75563	1.39833	2.42572	3.34688	2.8863	0.651362	1.99412
mmu-mir-190-5p	6.36471	3.72337	5.04404	1.86771	1.52618	3.34688	2.43653	1.28743	2.07017
mmu-mir-211-5p	0.899252	0	0.449626	0.635867	0.667073	3.34688	2.00698	1.89491	0.224031
mmu-mir-181b-2-5p_+_1	0.749377	1.17393	0.961652	0.300203	1.21286	3.30397	2.25842	1.47864	0.425808
mmu-let-7f-1-5p_-_1	3.09742	2.20556	2.65149	0.630643	1.33415	3.28967	2.31191	1.38277	1.14689
mmu-mir-652-3p_+_1	0	0	0	0	1.21286	3.26107	2.23696	1.4483	0
mmu-mir-99b-5p_+_4	1.37885	1.2095	1.29418	0.11975	1.09157	3.26107	2.17632	1.53406	0.594663
mmu-mir-470-5p	0.959203	0	0.479601	0.678259	0.788358	3.26107	2.02471	1.74847	0.236874
mmu-mir-143-3p_+_1	2.93756	1.06721	2.00238	1.32254	0	3.26107	1.63053	2.30592	1.22805
mmu-mir-194-2-3p_+_1	4.37636	2.5613	3.46883	1.28344	3.82051	3.17525	3.49788	0.456267	0.991696
mmu-mir-1943-5p_+_1	1.6786	1.84983	1.76422	0.121072	2.48636	3.17525	2.8308	0.487116	0.62322
mmu-mir-3073b-3p	1.4388	1.70753	1.57317	0.190019	2.06186	3.17525	2.61855	0.787284	0.600777
mmu-mir-29a-3p_+_6	2.33806	1.77868	2.05837	0.39554	1.87993	3.17525	2.52759	0.915927	0.81436
mmu-mir-871-3p	0.839302	1.60081	1.22006	0.538468	1.698	3.17525	2.43663	1.04457	0.500716
mmu-mir-350-3p	2.33806	2.63244	2.48525	0.208164	1.09157	3.17525	2.13341	1.47338	1.16492
mmu-mir-212-5p_+_1	0	0	0	0	1.09157	3.17525	2.13341	1.47338	0
mmu-mir-191-3p_+_1	2.87761	1.84983	2.36372	0.726752	1.57672	3.08943	2.33307	1.06965	1.01313
mmu-mir-5115_+_6	2.24813	6.97242	4.61028	3.34058	6.96788	3.00361	4.98574	2.80316	0.924691
mmu-mir-744-3p	4.61616	3.91309	4.26463	0.497145	2.42572	3.00361	2.71467	0.408633	1.57096
mmu-mir-222-5p	2.03831	1.99212	2.01521	0.032658	1.15222	3.00361	2.07791	1.30914	0.969825
mmu-mir-134-5p	0	0	0	0	0	3.00361	1.50181	2.12388	0
mmu-mir-30a-5p_+_8	3.16237	3.89531	3.52884	0.518263	1.33415	2.9607	2.14742	1.15015	1.64329
mmu-mir-181b-1-5p_+_1	0.689427	0.960486	0.824957	0.191668	1.03093	2.9607	1.99582	1.36456	0.413343
mmu-mir-7a-1-3p	5.03581	3.34392	4.18986	1.19635	1.45543	2.9178	2.18661	1.03405	1.91614
mmu-mir-29a-5p	2.75771	2.98818	2.87294	0.162969	1.2735	2.9178	2.09565	1.16269	1.37091
mmu-mir-342-5p_+_1	1.0791	1.63638	1.35774	0.394057	1.21286	2.9178	2.06533	1.20557	0.657399
mmu-let-7f-2-5p_+_5	1.74055	1.28658	1.51357	0.321009	1.07338	2.91064	1.99201	1.29914	0.759817
mmu-mir-139-3p	1.3189	1.63638	1.47764	0.224493	1.81929	2.83198	2.32563	0.716079	0.635373
mmu-mir-5117-3p_-_6	0	0.99606	0.49803	0.704321	1.15222	2.83198	1.9921	1.18777	0.250003
mmu-mir-511-3p_+_1	1.37885	1.56524	1.47205	0.131793	0.970287	2.83198	1.90113	1.31641	0.774299
mmu-mir-337-5p_+_3	0	0	0	0	0	2.83198	1.41599	2.00251	0
mmu-mir-300-3p	0	0	0	0	0	2.83198	1.41599	2.00251	0
mmu-mir-3073b-5p	3.17736	2.20556	2.69146	0.687164	1.33415	2.78907	2.06161	1.02879	1.30552
mmu-mir-467d-5p	1.25895	0	0.629477	0.890214	0.667073	2.78907	1.72807	1.50048	0.364266
mmu-mir-503-3p_-_1	2.15821	1.42294	1.79057	0.519909	2.30443	2.74616	2.5253	0.312349	0.709055
mmu-mir-335-3p_-_1	3.65696	2.63244	3.1447	0.724442	1.63736	2.74616	2.19176	0.78404	1.43478
mmu-mir-1839-5p_-_1	2.03831	2.06327	2.05079	0.0176506	1.57672	2.74616	2.16144	0.826921	0.948806
mmu-mir-331-3p_+_1	1.25895	2.20556	1.73226	0.669353	1.45543	2.74616	2.1008	0.912684	0.824572
mmu-mir-29b-1-5p	1.34888	1.49409	1.42148	0.10268	1.15222	2.74616	1.94919	1.12709	0.72927
mmu-mir-25-3p_+_1	1.199	1.13835	1.16868	0.0428853	0	2.74616	1.37308	1.94183	0.851137
mmu-mir-125b-1-5p_+_4	1.22898	1.3518	1.29039	0.086845	0.939966	2.70325	1.82161	1.24683	0.708378
mmu-mir-33-5p	4.67611	4.33998	4.50804	0.237685	3.03215	2.66034	2.84625	0.262906	1.58386
mmu-mir-99b-5p_+_3	1.49875	0	0.749377	1.05978	0.849001	2.66034	1.75467	1.28081	0.427075
mmu-mir-125b-2-5p_+_4	1.16903	1.13835	1.15369	0.0216897	0.879323	2.61743	1.74838	1.22903	0.659864
mmu-mir-203-5p	3.65696	2.49015	3.07355	0.825059	1.81929	2.57453	2.19691	0.534033	1.39904
mmu-mir-320-3p_-_1	1.199	0.99606	1.09753	0.143503	1.57672	2.57453	2.07562	0.705557	0.528773
mmu-mir-5121_+_1	2.18818	1.13835	1.66327	0.742339	1.21286	2.57453	1.89369	0.962843	0.87832
mmu-mir-409-3p_-_1	0	0	0	0	0	2.57453	1.28726	1.82046	0
mmu-mir-5105	3.29726	3.13047	3.21387	0.117934	13.8266	2.48871	8.15765	8.0171	0.39397
mmu-mir-185-3p	1.73855	1.3518	1.54518	0.27348	1.51607	2.48871	2.00239	0.687756	0.771665
mmu-mir-664-5p_-_1	2.15821	2.5613	2.35975	0.285029	1.09157	2.48871	1.79014	0.987923	1.31819
mmu-mir-214-3p_-_2	0	0	0	0	0	2.4458	1.2229	1.72944	0
mmu-mir-29c-5p_+_2	2.39801	3.6285	3.01326	0.870093	1.81929	2.40289	2.11109	0.412669	1.42735
mmu-mir-598-3p	1.5587	1.77868	1.66869	0.155545	1.698	2.40289	2.05045	0.498431	0.813818
mmu-mir-351-3p_+_1	0.959203	0.924913	0.942058	0.0242465	1.698	2.40289	2.05045	0.498431	0.45944
mmu-mir-10a-5p_+_3	2.09826	1.06721	1.58273	0.729061	1.09157	2.40289	1.74723	0.927241	0.905851
mmu-mir-677-5p_-_1	1.0791	0.924913	1.00201	0.109029	1.09157	2.40289	1.74723	0.927241	0.573483
mmu-mir-497-5p_+_1	0.779352	0	0.389676	0.551085	0	2.40289	1.20145	1.6991	0.324339
mmu-mir-363-3p	0	0	0	0	0	2.40289	1.20145	1.6991	0
mmu-mir-409-3p	0	0	0	0	0	2.40289	1.20145	1.6991	0
mmu-let-7f-1-5p_+_5	1.50075	0.930842	1.2158	0.402988	0.891452	2.39574	1.6436	1.06369	0.739718
mmu-let-7c-2-5p_+_5	1.03914	1.24508	1.14211	0.145621	0.924805	2.39574	1.66027	1.04011	0.687903
mmu-mir-5102_-_6	2.30309	2.49015	2.39662	0.132275	28.5527	2.35283	15.4528	18.5261	0.155093
mmu-let-7a-1-5p_+_5	1.48976	1.69567	1.59272	0.145602	1.12189	2.3514	1.73665	0.869391	0.917122
mmu-mir-5109	1.199	2.82217	2.01059	1.14775	5.69033	2.33138	4.01085	2.37514	0.501286
mmu-mir-378-3p_+_2	2.79268	1.3518	2.07224	1.01886	1.91025	2.32933	2.11979	0.296334	0.977566
mmu-mir-503-3p	2.45796	2.63244	2.5452	0.123381	1.94057	2.31707	2.12882	0.266224	1.19559
mmu-mir-99b-5p_+_2	0	0	0	0	0.970287	2.31707	1.64368	0.952321	0
mmu-mir-421-3p_+_1	1.73855	1.77868	1.75862	0.0283719	0	2.31707	1.15854	1.63842	1.51796
mmu-mir-501-3p_+_2	0	0	0	0	0	2.31707	1.15854	1.63842	0
mmu-mir-322-5p_-_1	1.73855	0.99606	1.36731	0.525023	1.15222	2.23126	1.69174	0.762996	0.808227
mmu-mir-188-5p	0.899252	0.924913	0.912083	0.0181447	0.970287	2.23126	1.60077	0.891639	0.569777
mmu-mir-542-5p	1.25895	1.56524	1.4121	0.216575	0.788358	2.23126	1.50981	1.02028	0.935282
mmu-mir-3082-3p_+_1	1.199	1.56524	1.38212	0.258967	0.727716	2.23126	1.47949	1.06316	0.93419
mmu-mir-5114	0	0	0	0	0	2.23126	1.11563	1.57774	0
mmu-let-7c-1-5p_+_5	1.03914	1.2095	1.12432	0.120466	0.985448	2.2241	1.60478	0.875862	0.700608
mmu-let-7a-2-5p_+_5	1.42981	1.69567	1.56274	0.187993	1.09157	2.17976	1.63567	0.769468	0.955415
mmu-mir-103-2-3p_+_2	1.18901	1.36365	1.27633	0.123491	0.879323	2.15974	1.51953	0.905392	0.839951
mmu-mir-103-1-3p_+_2	1.18901	1.15021	1.16961	0.0274353	0.758037	2.15974	1.45889	0.991154	0.801714
mmu-mir-122-3p_-_2	3.35721	2.5613	2.95925	0.562795	1.698	2.14544	1.92172	0.316384	1.5399
mmu-mir-3082-3p	1.4388	1.42294	1.43087	0.0112154	1.63736	2.14544	1.8914	0.359265	0.756516
mmu-mir-423-5p_+_2	1.5587	1.77868	1.66869	0.155545	0.909644	2.14544	1.52754	0.873838	1.0924
mmu-mir-5102_-_5	1.96337	3.11269	2.53803	0.812692	15.3477	2.13829	8.743	9.34048	0.290292
mmu-mir-92a-1-3p_-_1	0.989178	0.782619	0.885898	0.146059	0.849001	2.10253	1.47577	0.886378	0.600297
mmu-let-7c-1-5p_+_3	0.809327	1.31622	1.06277	0.358429	1.63736	2.08823	1.86279	0.318811	0.570527
mmu-mir-26b-5p_+_1	2.47794	0.806334	1.64214	1.182	0.909644	2.08823	1.49894	0.833383	1.09554
mmu-mir-215-5p_+_1	11.8402	5.94079	8.89047	4.17148	2.88054	2.05962	2.47008	0.580478	3.59926
mmu-mir-671-3p_-_1	0	0	0	0	1.09157	2.05962	1.5756	0.684513	0
mmu-mir-1955-5p	0.679435	0.99606	0.837748	0.223888	0.727716	2.05962	1.39367	0.941799	0.60111
mmu-mir-5107_-_1	0	0	0	0	0	2.05962	1.02981	1.45637	0
mmu-mir-540-3p	0	0	0	0	0	2.05962	1.02981	1.45637	0
mmu-let-7c-2-5p_+_3	0.839302	1.45852	1.14891	0.437851	1.63736	2.00241	1.81988	0.258128	0.631309
mmu-mir-3473d_+_1	1.95338	2.25892	2.10615	0.216053	1.58682	1.98811	1.78746	0.283749	1.17829
mmu-mir-150-3p	0	0	0	0	0.849001	1.9738	1.4114	0.795355	0
mmu-mir-23a-3p_+_1	1.3189	1.10278	1.21084	0.152822	0	1.93089	0.965447	1.36535	1.25418
mmu-mir-345-5p_+_2	1.4388	2.13441	1.78661	0.491871	1.51607	1.88799	1.70203	0.262981	1.04969
mmu-mir-183-3p_+_1	0.959203	0.853766	0.906484	0.0745551	1.2735	1.88799	1.58074	0.434505	0.573454
mmu-mir-142-3p_+_2	0.659452	1.38737	1.02341	0.514715	0	1.88799	0.943993	1.33501	1.08413
mmu-mir-142-5p_-_1	0	1.28065	0.640324	0.905555	0	1.88799	0.943993	1.33501	0.678315
mmu-mir-24-2-3p_-_1	0.869277	0	0.434639	0.614672	0	1.84508	0.922538	1.30467	0.471133
mmu-mir-24-1-3p_-_1	0.869277	0	0.434639	0.614672	0	1.84508	0.922538	1.30467	0.471133
mmu-mir-5102_-_1	2.74772	2.32414	2.53593	0.299513	4.46736	1.81647	3.14192	1.87447	0.807127
mmu-mir-677-5p	1.25895	1.2095	1.23423	0.0349678	1.2735	1.80217	1.53783	0.373823	0.802575
mmu-mir-136-5p	0.719402	0	0.359701	0.508694	0	1.80217	0.901084	1.27433	0.399187
mmu-mir-423-3p_-_2	0	0	0	0	0	1.80217	0.901084	1.27433	0
mmu-mir-5114_-_1	0	0	0	0	0	1.80217	0.901084	1.27433	0
mmu-mir-125b-1-3p_-_1	0	0	0	0	0	1.80217	0.901084	1.27433	0
mmu-let-7a-2-5p_-_1	1.17902	1.39527	1.28715	0.152915	1.29372	1.77356	1.53364	0.339302	0.839276
mmu-mir-101b-3p_+_2	3.85346	2.94075	3.39711	0.645387	2.06186	1.71635	1.88911	0.244313	1.79826
mmu-mir-674-5p_+_1	0	0.924913	0.462456	0.654012	1.698	1.71635	1.70718	0.0129736	0.27089
mmu-mir-99a-5p_+_3	2.15821	0.853766	1.50599	0.922378	1.15222	1.71635	1.43428	0.398903	1.04999
mmu-mir-101a-5p_+_1	1.85845	2.84589	2.35217	0.698219	1.03093	1.71635	1.37364	0.484665	1.71236
mmu-mir-1948-5p_+_1	4.94589	2.77474	3.86031	1.53523	0.939966	1.71635	1.32816	0.548987	2.90652
mmu-mir-143-3p_-_2	0.899252	0	0.449626	0.635867	0.909644	1.71635	1.313	0.570427	0.342443
mmu-mir-125a-5p_+_2	0	0	0	0	0.879323	1.71635	1.29784	0.591868	0
mmu-mir-28-5p_-_1	1.01915	0.924913	0.972033	0.0666376	0.788358	1.71635	1.25235	0.656189	0.776164
mmu-let-7a-2-5p_+_6	0.969194	0	0.484597	0.685324	0.707501	1.71635	1.21193	0.713364	0.399857
mmu-let-7a-1-5p_+_6	0.849294	0	0.424647	0.600542	0.707501	1.71635	1.21193	0.713364	0.35039
mmu-mir-100-5p_+_3	1.13905	0	0.569527	0.805432	0	1.71635	0.858175	1.21364	0.663648
mmu-mir-140-3p_+_4	1.0791	0	0.539551	0.763041	0	1.71635	0.858175	1.21364	0.628719
mmu-mir-378-5p_+_1	1.49875	1.38737	1.44306	0.0787609	1.18254	1.67344	1.42799	0.347121	1.01055
mmu-mir-3068-3p_+_2	3.89676	2.84589	3.37132	0.743081	3.15343	1.63053	2.39198	1.07685	1.40943
mmu-mir-351-3p	0.899252	1.28065	1.08995	0.269688	1.81929	1.63053	1.72491	0.133471	0.631888
mmu-mir-137-3p	2.87761	2.13441	2.50601	0.525517	1.63736	1.63053	1.63395	0.00482753	1.53372
mmu-mir-101b-5p_+_1	0.839302	1.63638	1.23784	0.563622	1.57672	1.63053	1.60362	0.0380535	0.771903
mmu-mir-3073b-3p_-_1	0.899252	0.99606	0.947656	0.0684533	1.09157	1.63053	1.36105	0.381102	0.696267
mmu-mir-802-3p_+_1	2.15821	2.77474	2.46647	0.435955	0.727716	1.63053	1.17912	0.638388	2.09178
mmu-mir-210-3p_-_1	1.37885	1.42294	1.4009	0.0311758	0.727716	1.63053	1.17912	0.638388	1.18808
mmu-mir-467d-5p_-_1	0.629477	0	0.314738	0.445107	0.727716	1.63053	1.17912	0.638388	0.266926
mmu-mir-3068-5p	0	1.06721	0.533604	0.754629	0.667073	1.63053	1.1488	0.681269	0.464487
mmu-mir-10a-3p_+_1	0.959203	0.782619	0.870911	0.124864	0	1.63053	0.815266	1.15296	1.06825
mmu-let-7c-2-5p_+_4	0.719402	0.782619	0.75101	0.0447009	0.707501	1.61623	1.16187	0.642568	0.646383
mmu-let-7a-1-5p_-_1	1.37885	1.2767	1.32777	0.0722364	1.32404	1.55902	1.44153	0.166156	0.921088
mmu-mir-133a-2-3p	0.929227	0	0.464614	0.657063	1.05114	1.55902	1.30508	0.359121	0.356004
mmu-mir-133a-1-3p	0.929227	0	0.464614	0.657063	1.05114	1.55902	1.30508	0.359121	0.356004
mmu-mir-5099_+_4	0	0	0	0	0.909644	1.55902	1.23433	0.459177	0
mmu-mir-455-3p_-_2	1.0791	2.5613	1.8202	1.04807	2.18315	1.54472	1.86393	0.451439	0.976538
mmu-mir-26a-2-3p	2.93756	1.28065	2.1091	1.17161	1.2735	1.54472	1.40911	0.191777	1.49676
mmu-mir-101a-5p	1.81849	1.92097	1.86973	0.0724676	1.15222	1.54472	1.34847	0.277539	1.38656
mmu-mir-674-5p_-_1	1.01915	0.782619	0.900886	0.167255	1.03093	1.54472	1.28782	0.363301	0.699542
mmu-mir-21-5p_+_4	0	0.924913	0.462456	0.654012	0.879323	1.54472	1.21202	0.470503	0.381559
mmu-mir-23b-3p_-_1	1.199	0.99606	1.09753	0.143503	0.667073	1.54472	1.10589	0.620587	0.992438
mmu-mir-200a-5p	0	0	0	0	0.667073	1.54472	1.10589	0.620587	0
mmu-mir-148a-3p_+_4	2.21816	1.28065	1.7494	0.662918	0	1.54472	0.772358	1.09228	2.26502
mmu-mir-23b-3p_+_3	1.04913	1.06721	1.05817	0.012784	0	1.54472	0.772358	1.09228	1.37005
mmu-mir-93-5p_+_1	1.13905	0.853766	0.996409	0.201729	0	1.54472	0.772358	1.09228	1.29009
mmu-mir-5117-3p_+_1	0	0	0	0	0	1.54472	0.772358	1.09228	0
mmu-mir-181d-3p_+_1	0	0	0	0	0	1.54472	0.772358	1.09228	0
mmu-mir-431-5p	0	0	0	0	0	1.54472	0.772358	1.09228	0
mmu-let-7c-1-5p_+_4	0.659452	0	0.329726	0.466303	0.646858	1.53041	1.08864	0.624767	0.30288
mmu-let-7f-2-5p_+_1	1.78352	0.924913	1.35422	0.607125	0.788358	1.50181	1.14508	0.504484	1.18264
mmu-let-7f-2-5p_+_6	1.54072	0.768389	1.15455	0.54612	0	1.49322	0.746612	1.05587	1.54639
mmu-mir-27b-3p_+_4	1.99934	0	0.999669	1.41375	0	1.48035	0.740176	1.04677	1.35058
mmu-mir-29c-5p	1.7985	1.28065	1.53958	0.36618	1.03093	1.4589	1.24491	0.302619	1.23669
mmu-mir-3076-3p	1.01915	0.924913	0.972033	0.0666376	0.909644	1.4589	1.18427	0.388381	0.820786
mmu-mir-133a-2-3p_+_1	0.809327	0	0.404664	0.572281	0.808573	1.4589	1.13374	0.459849	0.35693
mmu-mir-133a-1-3p_+_1	0.809327	0	0.404664	0.572281	0.808573	1.4589	1.13374	0.459849	0.35693
mmu-mir-122-3p_-_1	1.49875	1.28065	1.3897	0.154224	0.788358	1.4589	1.12363	0.474143	1.2368
mmu-mir-106b-3p_-_1	0	0.99606	0.49803	0.704321	0.788358	1.4589	1.12363	0.474143	0.443234
mmu-mir-140-3p_+_3	1.5587	1.42294	1.49082	0.0959977	0	1.4589	0.729449	1.0316	2.04377
mmu-mir-187-3p_-_1	0.899252	1.13835	1.0188	0.169071	0	1.4589	0.729449	1.0316	1.39668
mmu-mir-143-3p_+_2	0.809327	0	0.404664	0.572281	0	1.4589	0.729449	1.0316	0.554752
mmu-mir-3061-3p	0.659452	0	0.329726	0.466303	0	1.4589	0.729449	1.0316	0.452021
mmu-mir-125b-2-5p_+_2	0.659452	0	0.329726	0.466303	0	1.4589	0.729449	1.0316	0.452021
mmu-mir-125b-1-5p_+_2	0.659452	0	0.329726	0.466303	0	1.4589	0.729449	1.0316	0.452021
mmu-mir-381-3p	0	0	0	0	0	1.4589	0.729449	1.0316	0
mmu-mir-410-3p	0	0	0	0	0	1.4589	0.729449	1.0316	0
mmu-let-7a-2-5p_+_3	1.12906	0.877481	1.00327	0.177894	0.970287	1.41599	1.19314	0.315159	0.840868
mmu-let-7f-1-5p_+_1	1.57369	0.782619	1.17816	0.559373	0.667073	1.41599	1.04153	0.529564	1.13118
mmu-mir-29b-2-3p_-_1	2.45796	1.39923	1.92859	0.748635	0	1.40169	0.700843	0.991142	2.75182
mmu-mir-29b-1-3p_-_1	2.45796	1.39923	1.92859	0.748635	0	1.40169	0.700843	0.991142	2.75182
mmu-mir-455-3p_-_1	1.13905	1.13835	1.1387	0.00049409	2.36508	1.37308	1.86908	0.701447	0.609233
mmu-let-7a-1-5p_+_3	1.12906	0.913055	1.02106	0.15274	0.970287	1.37308	1.17168	0.284818	0.871445
mmu-mir-669c-5p	0.779352	0.99606	0.887706	0.153236	0.788358	1.37308	1.08072	0.413461	0.821403
mmu-mir-505-5p	1.13905	1.42294	1.281	0.20074	0.667073	1.37308	1.02008	0.499223	1.25579
mmu-mir-27b-5p_-_1	1.0791	0	0.539551	0.763041	0	1.37308	0.68654	0.970914	0.785899
mmu-mir-191-5p_+_5	0.719402	0	0.359701	0.508694	0	1.37308	0.68654	0.970914	0.523933
mmu-mir-132-3p_+_1	0	0	0	0	0	1.37308	0.68654	0.970914	0
mmu-let-7f-2-5p_+_3	1.04913	1.05535	1.05224	0.00439926	0	1.30443	0.652213	0.922369	1.61334
mmu-mir-365-2-5p_-_1	2.39801	1.99212	2.19506	0.287005	1.63736	1.28726	1.46231	0.247556	1.50109
mmu-mir-676-3p_+_1	0	1.2095	0.604751	0.855247	0.909644	1.28726	1.09845	0.267016	0.550547
mmu-mir-1948-3p_-_1	1.5587	1.70753	1.63312	0.105237	0.849001	1.28726	1.06813	0.309898	1.52895
mmu-mir-296-5p	0	1.56524	0.782619	1.10679	0.788358	1.28726	1.03781	0.352779	0.754105
mmu-mir-672-5p	0	0	0	0	0.727716	1.28726	1.00749	0.39566	0
mmu-mir-340-5p_-_1	2.15821	0.99606	1.57713	0.821761	0.667073	1.28726	0.977168	0.438541	1.61398
mmu-mir-22-3p_+_3	1.4388	1.28065	1.35973	0.111833	0	1.28726	0.643631	0.910232	2.11259
mmu-mir-21-5p_+_5	1.04913	0.924913	0.98702	0.0878332	0	1.28726	0.643631	0.910232	1.53352
mmu-mir-148b-5p_+_1	0	0.924913	0.462456	0.654012	0	1.28726	0.643631	0.910232	0.718511
mmu-mir-125a-5p_+_4	0.749377	0	0.374689	0.52989	0	1.28726	0.643631	0.910232	0.582148
mmu-mir-92b-3p_+_1	0	0	0	0	0	1.28726	0.643631	0.910232	0
mmu-mir-26a-2-5p_+_4	1.61865	0	0.809327	1.14456	0.778251	1.27296	1.02561	0.349812	0.789121
mmu-mir-26a-1-5p_+_4	1.61865	0	0.809327	1.14456	0.778251	1.27296	1.02561	0.349812	0.789121
mmu-mir-501-5p	0	0	0	0	0	1.25866	0.629328	0.890005	0
mmu-mir-187-3p_+_1	0.839302	0.99606	0.917681	0.110844	1.09157	1.20145	1.14651	0.0776912	0.800413
mmu-mir-148a-3p_+_3	3.71691	0	1.85845	2.62825	1.09157	1.20145	1.14651	0.0776912	1.62097
mmu-mir-1934-5p	0	1.06721	0.533604	0.754629	0.788358	1.20145	0.994902	0.292096	0.536338
mmu-mir-365-2-5p	2.39801	0.99606	1.69703	0.991326	0.788358	1.20145	0.994902	0.292096	1.70573
mmu-mir-3082-3p_+_2	1.5587	0.782619	1.17066	0.548775	0.788358	1.20145	0.994902	0.292096	1.17666
mmu-mir-26a-1-5p_+_3	1.61865	0	0.809327	1.14456	0.74793	1.20145	0.974688	0.320684	0.830345
mmu-mir-26a-2-5p_+_3	1.61865	0	0.809327	1.14456	0.74793	1.20145	0.974688	0.320684	0.830345
mmu-mir-421-3p_+_4	1.01915	0	0.509576	0.72065	0.727716	1.20145	0.96458	0.334977	0.528288
mmu-mir-615-3p	0	0	0	0	0.727716	1.20145	0.96458	0.334977	0
mmu-mir-28-3p_-_1	0.719402	0.924913	0.822157	0.145318	0.667073	1.20145	0.934259	0.377859	0.88001
mmu-mir-16-2-3p	1.0791	1.99212	1.53561	0.645601	0	1.20145	0.600723	0.84955	2.55627
mmu-mir-16-1-3p	0.719402	1.3518	1.0356	0.44717	0	1.20145	0.600723	0.84955	1.72392
mmu-mir-190b-5p	0.839302	0.782619	0.81096	0.0400814	0	1.20145	0.600723	0.84955	1.34997
mmu-mir-32-3p	1.4388	0	0.719402	1.01739	0	1.20145	0.600723	0.84955	1.19756
mmu-mir-192-5p_+_5	1.0791	0	0.539551	0.763041	0	1.20145	0.600723	0.84955	0.898171
mmu-mir-200b-3p_+_2	1.01915	0	0.509576	0.72065	0	1.20145	0.600723	0.84955	0.848272
mmu-let-7e-3p_+_1	0	0	0	0	0	1.20145	0.600723	0.84955	0
mmu-mir-132-5p	0	0	0	0	0	1.20145	0.600723	0.84955	0
mmu-mir-425-3p_-_2	0	0	0	0	0	1.20145	0.600723	0.84955	0
mmu-let-7f-1-5p_+_3	0.869277	0	0.434639	0.614672	0	1.1757	0.58785	0.831345	0.73937
mmu-mir-21-5p_+_6	1.04913	1.17393	1.11153	0.088247	0	1.15854	0.579268	0.819209	1.91885
mmu-let-7d-5p_+_3	0	0	0	0	0	1.14423	0.572117	0.809095	0
mmu-mir-3107-3p	1.01915	2.13441	1.57678	0.788609	1.66768	1.11563	1.39165	0.390361	1.13303
mmu-mir-196b-5p	1.25895	1.3518	1.30537	0.0656495	1.51607	1.11563	1.31585	0.283158	0.992038
mmu-mir-1981-3p_+_1	2.15821	1.70753	1.93287	0.318675	1.21286	1.11563	1.16424	0.0687531	1.66019
mmu-let-7b-5p_+_5	0	1.22729	0.613644	0.867824	1.09157	1.11563	1.1036	0.017009	0.556038
mmu-mir-193b-3p_+_1	0	0	0	0	1.03093	1.11563	1.07328	0.0598901	0
mmu-let-7g-3p_+_1	0.779352	1.77868	1.27902	0.706631	0.788358	1.11563	0.951993	0.231414	1.34351
mmu-mir-222-3p_-_2	0	0.782619	0.391309	0.553395	0	1.11563	0.557814	0.788868	0.701505
mmu-mir-30a-5p_+_4	1.0791	0	0.539551	0.763041	0	1.11563	0.557814	0.788868	0.967261
mmu-mir-26a-2-5p_+_2	1.0791	0	0.539551	0.763041	0	1.11563	0.557814	0.788868	0.967261
mmu-mir-3060-3p_+_2	1.01915	0	0.509576	0.72065	0	1.11563	0.557814	0.788868	0.913524
mmu-mir-30a-5p_+_5	0.959203	0	0.479601	0.678259	0	1.11563	0.557814	0.788868	0.859787
mmu-mir-106a-5p	0.749377	0	0.374689	0.52989	0	1.11563	0.557814	0.788868	0.671709
mmu-mir-129-1-3p	0.719402	0	0.359701	0.508694	0	1.11563	0.557814	0.788868	0.644841
mmu-mir-5122_+_8	0	0	0	0	0	1.11563	0.557814	0.788868	0
mmu-mir-132-3p_+_2	0	0	0	0	0	1.11563	0.557814	0.788868	0
mmu-mir-122-5p_+_7	1.03914	0.907126	0.973131	0.0933452	0.727716	1.09417	0.910944	0.259125	1.06827
mmu-mir-92a-1-3p_+_4	0	0	0	0	0	1.07272	0.536359	0.758527	0
mmu-mir-490-3p	0	0	0	0	0	1.07272	0.536359	0.758527	0
mmu-let-7c-2-5p_+_6	0.819319	0	0.409659	0.579346	0	1.05842	0.529208	0.748413	0.774099
mmu-let-7c-2-5p_-_1	0.70941	0.849813	0.779612	0.0992798	0	1.04411	0.522057	0.738299	1.49335
mmu-mir-148a-3p_+_5	2.03831	0.782619	1.41046	0.887905	0.828787	1.02981	0.929299	0.142145	1.51777
mmu-mir-425-5p_+_1	1.0791	1.84983	1.46446	0.544983	0.727716	1.02981	0.878763	0.213613	1.66651
mmu-mir-16-1-5p_+_1	0.809327	1.3518	1.08056	0.383583	0	1.02981	0.514905	0.728186	2.09856
mmu-mir-30a-5p_+_7	1.37885	1.13835	1.2586	0.170059	0	1.02981	0.514905	0.728186	2.44434
mmu-mir-338-5p_-_2	1.49875	1.06721	1.28298	0.30515	0	1.02981	0.514905	0.728186	2.49168
mmu-mir-301b-3p	0	0.818192	0.409096	0.578549	0	1.02981	0.514905	0.728186	0.794508
mmu-mir-191-5p_+_2	1.199	0	0.599502	0.847823	0	1.02981	0.514905	0.728186	1.1643
mmu-mir-26a-1-5p_+_2	1.0791	0	0.539551	0.763041	0	1.02981	0.514905	0.728186	1.04787
mmu-mir-592-5p_+_1	1.01915	0	0.509576	0.72065	0	1.02981	0.514905	0.728186	0.989651
mmu-mir-664-3p_+_2	0.959203	0	0.479601	0.678259	0	1.02981	0.514905	0.728186	0.931436
mmu-mir-223-3p_-_1	0.839302	0	0.419651	0.593476	0	1.02981	0.514905	0.728186	0.815007
mmu-mir-326-3p_+_1	0	0	0	0	0	1.02981	0.514905	0.728186	0
mmu-mir-5122_+_1	0	0	0	0	0	1.02981	0.514905	0.728186	0
mmu-mir-100-5p_-_1	0	0	0	0	0	1.02981	0.514905	0.728186	0
mmu-mir-330-3p	0	0	0	0	0	1.02981	0.514905	0.728186	0
mmu-mir-485-3p_+_1	0	0	0	0	0	1.02981	0.514905	0.728186	0
mmu-mir-5102_-_4	1.59368	1.47037	1.53202	0.0871868	6.25633	0.986901	3.62162	3.72605	0.423022
mmu-let-7a-1-5p_+_4	0	0	0	0	0	0.986901	0.493451	0.697845	0
mmu-let-7a-2-5p_+_4	0	0	0	0	0	0.986901	0.493451	0.697845	0
mmu-let-7f-1-5p_+_6	0.911242	0.768389	0.839816	0.101013	0	0.97832	0.48916	0.691776	1.71685
mmu-mir-151-5p_+_1	1.03414	1.19171	1.11293	0.111422	0.667073	0.965447	0.81626	0.210983	1.36345
mmu-mir-296-3p	0	0	0	0	0	0.961156	0.480578	0.67964	0
mmu-mir-122-5p_-_2	0.899252	0	0.449626	0.635867	0.909644	0.943993	0.926819	0.0242879	0.485129
mmu-mir-99a-5p_+_5	1.61865	0.924913	1.27178	0.490549	0.667073	0.943993	0.805533	0.195812	1.57881
mmu-mir-130a-3p_-_1	1.3189	1.3518	1.33535	0.0232583	0	0.943993	0.471996	0.667504	2.82915
mmu-mir-664-5p_+_1	0.899252	1.3518	1.12552	0.319996	0	0.943993	0.471996	0.667504	2.3846
mmu-mir-16-2-5p_+_1	0.809327	1.3518	1.08056	0.383583	0	0.943993	0.471996	0.667504	2.28934
mmu-mir-130a-3p_+_4	0	1.13835	0.569177	0.804938	0	0.943993	0.471996	0.667504	1.20589
mmu-mir-29b-2-5p	0.719402	1.06721	0.893305	0.245935	0	0.943993	0.471996	0.667504	1.89261
mmu-mir-100-5p_+_4	0.899252	0.782619	0.840935	0.0824726	0	0.943993	0.471996	0.667504	1.78166
mmu-mir-30d-5p_+_2	0.929227	0	0.464614	0.657063	0	0.943993	0.471996	0.667504	0.984359
mmu-let-7c-1-5p_+_6	0.759369	0	0.379684	0.536955	0	0.943993	0.471996	0.667504	0.804422
mmu-mir-744-5p_+_1	0	0	0	0	0	0.943993	0.471996	0.667504	0
mmu-mir-455-3p_-_3	0	0	0	0	0	0.943993	0.471996	0.667504	0
mmu-mir-221-5p_-_1	0	0	0	0	0	0.943993	0.471996	0.667504	0
mmu-mir-351-5p_-_1	0	0	0	0	0	0.943993	0.471996	0.667504	0
mmu-mir-223-5p_-_1	0	0	0	0	0	0.943993	0.471996	0.667504	0
mmu-mir-5117-3p_-_7	0	0	0	0	0	0.943993	0.471996	0.667504	0
mmu-mir-218-1-5p	0	0	0	0	0	0.943993	0.471996	0.667504	0
mmu-mir-382-5p	0	0	0	0	0	0.943993	0.471996	0.667504	0
mmu-mir-5102_-_8	0.614489	0.788548	0.701518	0.123078	4.43199	0.915387	2.67369	2.48661	0.262379
mmu-mir-16-2-5p_-_1	0	1.38737	0.693685	0.981018	0	0.901084	0.450542	0.637163	1.53967
mmu-mir-191-5p_+_7	0.959203	1.2095	1.08435	0.176988	0	0.901084	0.450542	0.637163	2.40677
mmu-let-7f-2-5p_+_4	1.06911	0.865624	0.967367	0.143887	0	0.901084	0.450542	0.637163	2.14712
mmu-mir-27a-3p_-_1	0.689427	0	0.344713	0.487498	0	0.901084	0.450542	0.637163	0.765108
mmu-mir-187-5p_+_2	0	0	0	0	0	0.901084	0.450542	0.637163	0
mmu-mir-34b-5p	0	0	0	0	0	0.901084	0.450542	0.637163	0
mmu-let-7g-5p_+_6	0.827312	0	0.413656	0.584998	0	0.886781	0.44339	0.627049	0.932939
mmu-mir-20b-5p	0	0	0	0	0	0.886781	0.44339	0.627049	0
mmu-mir-1940	0.983183	0	0.491591	0.695215	1.54466	0.881468	1.21307	0.468949	0.405247
mmu-let-7f-2-3p	7.01417	5.69177	6.35297	0.935076	3.33536	0	1.66768	2.35846	3.80946
mmu-mir-5102_-_2	0.969194	1.16207	1.06563	0.136384	3.11301	0	1.5565	2.20123	0.684632
mmu-mir-5102_-_7	0.694423	0.936771	0.815597	0.171366	2.75925	0	1.37963	1.95109	0.591172
mmu-mir-486-5p_-_2	1.73855	3.7708	2.75468	1.43701	2.48636	0	1.24318	1.75812	2.21583
mmu-mir-28c_-_1	2.99751	3.10913	3.05332	0.0789288	2.42572	0	1.21286	1.71524	2.51746
mmu-mir-5102_+_8	0	0	0	0	1.97696	0	0.98848	1.39792	0
mmu-mir-1247-3p	2.27811	0	1.13905	1.61086	1.94057	0	0.970287	1.37219	1.17393
mmu-mir-215-3p	14.5079	1.2095	7.85872	9.40342	1.75865	0	0.879323	1.24355	8.93724
mmu-mir-5126	0	0.860485	0.430243	0.608455	1.58177	0	0.790885	1.11848	0.544001
mmu-mir-33-3p	2.21816	1.13835	1.67826	0.763535	1.57672	0	0.788358	1.11491	2.1288
mmu-mir-375-3p_-_1	1.25895	0	0.629477	0.890214	1.45543	0	0.727716	1.02915	0.865004
mmu-mir-1943-5p	1.01915	0.853766	0.936459	0.116946	1.21286	0	0.60643	0.857621	1.54422
mmu-mir-1247-5p_-_1	0.839302	0	0.419651	0.593476	1.15222	0	0.576108	0.81474	0.728424
mmu-mir-486-5p_+_1	0.899252	1.60081	1.25003	0.496077	1.09157	0	0.545787	0.771859	2.29033
mmu-mir-3107-5p_+_1	0.899252	1.60081	1.25003	0.496077	1.03093	0	0.515465	0.728978	2.42506
mmu-mir-1843-3p_-_3	0	0	0	0	1.03093	0	0.515465	0.728978	0
mmu-mir-128-1-5p	0.839302	0.853766	0.846534	0.0102272	0.970287	0	0.485144	0.686097	1.74491
mmu-mir-328-3p_-_1	0.779352	0.747045	0.763199	0.0228446	0.970287	0	0.485144	0.686097	1.57314
mmu-mir-375-3p_+_1	0.959203	0	0.479601	0.678259	0.970287	0	0.485144	0.686097	0.988576
mmu-mir-3105-5p	0	0	0	0	0.970287	0	0.485144	0.686097	0
mmu-mir-139-3p_+_3	0	0.853766	0.426883	0.603704	0.909644	0	0.454822	0.643216	0.938571
mmu-let-7b-5p_-_1	0	0.782619	0.391309	0.553395	0.909644	0	0.454822	0.643216	0.860357
mmu-mir-5102_+_1	0.779352	0	0.389676	0.551085	0.909644	0	0.454822	0.643216	0.856766
mmu-mir-1948-5p	1.3189	1.17393	1.24642	0.102513	0.88943	0	0.444715	0.628922	2.80273
mmu-mir-383-5p	1.73855	1.2095	1.47403	0.374097	0.849001	0	0.424501	0.600335	3.47238
mmu-mir-5126_+_1	0	0	0	0	0.821502	0	0.410751	0.58089	0
mmu-mir-1968-5p_-_2	1.4388	1.24508	1.34194	0.136987	0.788358	0	0.394179	0.557454	3.40439
mmu-mir-351-3p_+_2	0	0	0	0	0.788358	0	0.394179	0.557454	0
mmu-mir-351-5p_+_1	0	0	0	0	0.727716	0	0.363858	0.514573	0
mmu-mir-30d-5p_+_6	0	0	0	0	0.727716	0	0.363858	0.514573	0
mmu-mir-15a-3p	1.01915	1.2095	1.11433	0.134597	0.667073	0	0.333536	0.471692	3.34095
mmu-mir-486-3p_-_2	0	0.853766	0.426883	0.603704	0.667073	0	0.333536	0.471692	1.27987
mmu-mir-328-3p_+_1	0	0.782619	0.391309	0.553395	0.667073	0	0.333536	0.471692	1.17321
mmu-mir-201-5p	1.6786	0	0.839302	1.18695	0.667073	0	0.333536	0.471692	2.51637
mmu-mir-30c-1-3p_+_1	0.899252	0	0.449626	0.635867	0.667073	0	0.333536	0.471692	1.34806
mmu-mir-30d-5p_+_5	0	0	0	0	0.667073	0	0.333536	0.471692	0
mmu-mir-27a-5p	0	0	0	0	0.667073	0	0.333536	0.471692	0
mmu-mir-144-5p_+_1	1.37885	1.70753	1.54319	0.23241	0	0	0	0	#DIV/0!
mmu-mir-29c-3p_+_4	1.25895	1.63638	1.44767	0.266884	0	0	0	0	#DIV/0!
mmu-mir-26b-5p_-_1	0.779352	1.63638	1.20787	0.606013	0	0	0	0	#DIV/0!
mmu-mir-219-1-5p	0.929227	1.45852	1.19387	0.374264	0	0	0	0	#DIV/0!
mmu-mir-1933-3p	1.37885	1.24508	1.31196	0.0945958	0	0	0	0	#DIV/0!
mmu-mir-16-2-5p_+_5	1.28893	1.24508	1.267	0.0310091	0	0	0	0	#DIV/0!
mmu-mir-192-5p_-_2	2.03831	1.2095	1.6239	0.586053	0	0	0	0	#DIV/0!
mmu-mir-192-3p_-_1	0	1.2095	0.604751	0.855247	0	0	0	0	#DIV/0!
mmu-mir-16-1-5p_+_5	1.28893	1.17393	1.23143	0.0813177	0	0	0	0	#DIV/0!
mmu-mir-3073-3p	0.899252	1.06721	0.98323	0.118762	0	0	0	0	#DIV/0!
mmu-mir-802-5p_-_1	2.69776	0.99606	1.84691	1.20328	0	0	0	0	#DIV/0!
mmu-mir-16-1-3p_-_1	0	0.99606	0.49803	0.704321	0	0	0	0	#DIV/0!
mmu-mir-486-5p_+_3	0.939219	0.984202	0.961711	0.0318078	0	0	0	0	#DIV/0!
mmu-mir-98-3p	1.49875	0.924913	1.21183	0.405767	0	0	0	0	#DIV/0!
mmu-mir-10a-5p_+_5	1.4388	0.924913	1.18186	0.363376	0	0	0	0	#DIV/0!
mmu-mir-26a-2-5p_-_1	1.22898	0.924913	1.07695	0.215007	0	0	0	0	#DIV/0!
mmu-mir-126-5p_-_1	0	0.924913	0.462456	0.654012	0	0	0	0	#DIV/0!
mmu-mir-30a-5p_-_1	1.0791	0.853766	0.966434	0.159337	0	0	0	0	#DIV/0!
mmu-mir-203-3p_-_1	1.01915	0.853766	0.936459	0.116946	0	0	0	0	#DIV/0!
mmu-mir-17-5p_-_1	0.839302	0.853766	0.846534	0.0102272	0	0	0	0	#DIV/0!
mmu-mir-137-3p_+_1	0.839302	0.853766	0.846534	0.0102272	0	0	0	0	#DIV/0!
mmu-mir-295-3p	0.839302	0.853766	0.846534	0.0102272	0	0	0	0	#DIV/0!
mmu-mir-186-5p_-_1	0	0.853766	0.426883	0.603704	0	0	0	0	#DIV/0!
mmu-mir-22-3p_+_5	1.01915	0.818192	0.918672	0.142101	0	0	0	0	#DIV/0!
mmu-mir-101c_-_2	0.678246	0.817063	0.747654	0.0981586	0	0	0	0	#DIV/0!
mmu-mir-24-2-3p_+_2	1.04913	0.782619	0.915873	0.18845	0	0	0	0	#DIV/0!
mmu-mir-24-1-3p_+_2	1.04913	0.782619	0.915873	0.18845	0	0	0	0	#DIV/0!
mmu-mir-374-3p_-_7	0.959203	0.782619	0.870911	0.124864	0	0	0	0	#DIV/0!
mmu-mir-98-3p_+_1	0.779352	0.782619	0.780985	0.00230976	0	0	0	0	#DIV/0!
mmu-mir-10a-3p_-_1	0.779352	0.782619	0.780985	0.00230976	0	0	0	0	#DIV/0!
mmu-mir-3107-5p_+_3	0.699419	0.770761	0.73509	0.0504465	0	0	0	0	#DIV/0!
mmu-mir-126-5p_+_2	3.50708	0	1.75354	2.47988	0	0	0	0	#DIV/0!
mmu-mir-194-1-3p	2.33806	0	1.16903	1.65326	0	0	0	0	#DIV/0!
mmu-mir-148a-3p_+_7	1.8085	0	0.904248	1.2788	0	0	0	0	#DIV/0!
mmu-mir-1843-5p_-_2	1.7985	0	0.899252	1.27173	0	0	0	0	#DIV/0!
mmu-mir-126-3p_+_2	1.7985	0	0.899252	1.27173	0	0	0	0	#DIV/0!
mmu-mir-203-3p_+_2	1.52873	0	0.764365	1.08097	0	0	0	0	#DIV/0!
mmu-mir-3082-3p_-_1	1.37885	0	0.689427	0.974997	0	0	0	0	#DIV/0!
mmu-mir-26b-5p_+_2	1.3189	0	0.659452	0.932606	0	0	0	0	#DIV/0!
mmu-mir-126-5p_+_3	1.199	0	0.599502	0.847823	0	0	0	0	#DIV/0!
mmu-mir-505-3p	1.0791	0	0.539551	0.763041	0	0	0	0	#DIV/0!
mmu-mir-191-5p_+_3	1.0791	0	0.539551	0.763041	0	0	0	0	#DIV/0!
mmu-mir-30c-1-5p_-_1	1.04913	0	0.524564	0.741845	0	0	0	0	#DIV/0!
mmu-mir-30c-2-5p_-_1	1.04913	0	0.524564	0.741845	0	0	0	0	#DIV/0!
mmu-mir-7a-1-3p_+_1	1.01915	0	0.509576	0.72065	0	0	0	0	#DIV/0!
mmu-mir-101b-3p_-_2	1.01915	0	0.509576	0.72065	0	0	0	0	#DIV/0!
mmu-mir-27b-3p_+_2	0.989178	0	0.494589	0.699454	0	0	0	0	#DIV/0!
mmu-mir-676-5p_+_1	0.959203	0	0.479601	0.678259	0	0	0	0	#DIV/0!
mmu-mir-15a-5p_-_1	0.959203	0	0.479601	0.678259	0	0	0	0	#DIV/0!
mmu-mir-1960	0.899252	0	0.449626	0.635867	0	0	0	0	#DIV/0!
mmu-mir-802-3p_-_1	0.899252	0	0.449626	0.635867	0	0	0	0	#DIV/0!
mmu-mir-26b-5p_+_3	0.899252	0	0.449626	0.635867	0	0	0	0	#DIV/0!
mmu-mir-1948-5p_-_1	0.869277	0	0.434639	0.614672	0	0	0	0	#DIV/0!
mmu-mir-26a-1-5p_-_1	0.869277	0	0.434639	0.614672	0	0	0	0	#DIV/0!
mmu-mir-29c-3p_+_2	0.839302	0	0.419651	0.593476	0	0	0	0	#DIV/0!
mmu-let-7g-5p_+_1	0.839302	0	0.419651	0.593476	0	0	0	0	#DIV/0!
mmu-let-7f-1-5p_+_4	0.829311	0	0.414655	0.586411	0	0	0	0	#DIV/0!
mmu-mir-192-5p_-_3	0.779352	0	0.389676	0.551085	0	0	0	0	#DIV/0!
mmu-mir-26a-1-5p_-_3	0.779352	0	0.389676	0.551085	0	0	0	0	#DIV/0!
mmu-mir-203-3p_-_2	0.779352	0	0.389676	0.551085	0	0	0	0	#DIV/0!
mmu-mir-28c_-_3	0.779352	0	0.389676	0.551085	0	0	0	0	#DIV/0!
mmu-mir-101b-3p_+_4	0.756038	0	0.378019	0.5346	0	0	0	0	#DIV/0!
mmu-mir-16-2-5p_+_4	0.749377	0	0.374689	0.52989	0	0	0	0	#DIV/0!
mmu-mir-16-1-5p_+_4	0.749377	0	0.374689	0.52989	0	0	0	0	#DIV/0!
mmu-mir-107-5p	0.719402	0	0.359701	0.508694	0	0	0	0	#DIV/0!
mmu-mir-10a-5p_+_4	0.719402	0	0.359701	0.508694	0	0	0	0	#DIV/0!
mmu-let-7g-5p_-_2	0.719402	0	0.359701	0.508694	0	0	0	0	#DIV/0!
mmu-mir-1843-3p_-_2	0.719402	0	0.359701	0.508694	0	0	0	0	#DIV/0!
mmu-mir-1955-3p	0.719402	0	0.359701	0.508694	0	0	0	0	#DIV/0!
mmu-mir-30a-5p_+_6	0.719402	0	0.359701	0.508694	0	0	0	0	#DIV/0!
mmu-mir-338-3p_+_1	0.719402	0	0.359701	0.508694	0	0	0	0	#DIV/0!
mmu-mir-151-5p_-_2	0.659452	0	0.329726	0.466303	0	0	0	0	#DIV/0!
mmu-mir-10a-3p_-_2	0.659452	0	0.329726	0.466303	0	0	0	0	#DIV/0!
mmu-mir-30d-5p_-_1	0.659452	0	0.329726	0.466303	0	0	0	0	#DIV/0!
mmu-mir-29c-5p_+_1	0.659452	0	0.329726	0.466303	0	0	0	0	#DIV/0!
mmu-mir-30a-5p_+_3	0.659452	0	0.329726	0.466303	0	0	0	0	#DIV/0!
mmu-mir-378b	0.656454	0	0.328227	0.464183	0	0	0	0	#DIV/0!
mmu-let-7e-5p_-_1	0.639468	0	0.319734	0.452172	0	0	0	0	#DIV/0!
mmu-mir-21-5p_+_2	0	0	0	0	0	0	0	0	#DIV/0!
mmu-mir-155-5p_+_1	0	0	0	0	0	0	0	0	#DIV/0!
mmu-mir-133a-1-3p_+_2	0	0	0	0	0	0	0	0	#DIV/0!
mmu-let-7c-2-5p_+_2	0	0	0	0	0	0	0	0	#DIV/0!
mmu-mir-9-2-5p	0	0	0	0	0	0	0	0	#DIV/0!
mmu-mir-3970_-_1	0	0	0	0	0	0	0	0	#DIV/0!
mmu-mir-323-3p	0	0	0	0	0	0	0	0	#DIV/0!
mmu-mir-452-5p_-_3	0	0	0	0	0	0	0	0	#DIV/0!
mmu-mir-329-5p	0	0	0	0	0	0	0	0	#DIV/0!
mmu-let-7b-5p_+_6	0	0	0	0	0	0	0	0	#DIV/0!
mmu-mir-504-5p_+_1	0	0	0	0	0	0	0	0	#DIV/0!
mmu-mir-215-5p_+_3	0	0	0	0	0	0	0	0	#DIV/0!
mmu-mir-668-3p	0	0	0	0	0	0	0	0	#DIV/0!
mmu-mir-1306-3p	0	0	0	0	0	0	0	0	#DIV/0!
mmu-mir-191-5p_-_1	0	0	0	0	0	0	0	0	#DIV/0!
mmu-mir-200b-5p_+_1	0	0	0	0	0	0	0	0	#DIV/0!
mmu-mir-10b-5p_+_4	0	0	0	0	0	0	0	0	#DIV/0!
mmu-mir-375-3p_+_2	0	0	0	0	0	0	0	0	#DIV/0!
mmu-mir-760-3p_-_1	0	0	0	0	0	0	0	0	#DIV/0!
mmu-mir-193b-5p	0	0	0	0	0	0	0	0	#DIV/0!
mmu-let-7a-2-5p_+_1	0	0	0	0	0	0	0	0	#DIV/0!
mmu-mir-181a-1-5p_-_1	0	0	0	0	0	0	0	0	#DIV/0!
mmu-mir-708-5p	0	0	0	0	0	0	0	0	#DIV/0!
mmu-mir-615-5p	0	0	0	0	0	0	0	0	#DIV/0!
mmu-mir-341-3p_-_1	0	0	0	0	0	0	0	0	#DIV/0!
mmu-mir-141-5p_-_1	0	0	0	0	0	0	0	0	#DIV/0!
mmu-mir-3074-1-5p	0	0	0	0	0	0	0	0	#DIV/0!
mmu-mir-133b-3p	0	0	0	0	0	0	0	0	#DIV/0!
mmu-mir-467e-5p	0	0	0	0	0	0	0	0	#DIV/0!
mmu-mir-380-3p	0	0	0	0	0	0	0	0	#DIV/0!
mmu-mir-141-3p_-_1	0	0	0	0	0	0	0	0	#DIV/0!
mmu-mir-377-3p_-_3	0	0	0	0	0	0	0	0	#DIV/0!
mmu-mir-341-3p	0	0	0	0	0	0	0	0	#DIV/0!
mmu-mir-200b-3p_+_3	0	0	0	0	0	0	0	0	#DIV/0!
mmu-mir-378-3p_+_5	0	0	0	0	0	0	0	0	#DIV/0!
mmu-mir-378-3p_-_2	0	0	0	0	0	0	0	0	#DIV/0!
mmu-mir-409-3p_+_1	0	0	0	0	0	0	0	0	#DIV/0!
mmu-mir-5117-3p_-_8	0	0	0	0	0	0	0	0	#DIV/0!
mmu-mir-10b-5p_+_2	0	0	0	0	0	0	0	0	#DIV/0!
mmu-mir-124-3-3p	0	0	0	0	0	0	0	0	#DIV/0!
mmu-mir-181b-1-3p	0	0	0	0	0	0	0	0	#DIV/0!
mmu-mir-10b-5p_-_1	0	0	0	0	0	0	0	0	#DIV/0!
mmu-mir-196a-1-3p_-_1	0	0	0	0	0	0	0	0	#DIV/0!
mmu-let-7d-5p_+_5	0	0	0	0	0	0	0	0	#DIV/0!
mmu-mir-3058-3p	0	0	0	0	0	0	0	0	#DIV/0!
mmu-mir-1843b-3p_-_4	0	0	0	0	0	0	0	0	#DIV/0!
mmu-let-7i-5p_+_1	0	0	0	0	0	0	0	0	#DIV/0!
mmu-mir-194-1-3p_+_1	0	0	0	0	0	0	0	0	#DIV/0!
mmu-mir-181a-2-5p_-_1	0	0	0	0	0	0	0	0	#DIV/0!
mmu-mir-124-2-3p	0	0	0	0	0	0	0	0	#DIV/0!
mmu-mir-181c-5p_-_1	0	0	0	0	0	0	0	0	#DIV/0!
mmu-mir-181c-3p_-_1	0	0	0	0	0	0	0	0	#DIV/0!
mmu-mir-5117-5p_-_1	0	0	0	0	0	0	0	0	#DIV/0!
mmu-mir-490-3p_-_1	0	0	0	0	0	0	0	0	#DIV/0!
mmu-mir-205-3p	0	0	0	0	0	0	0	0	#DIV/0!
mmu-mir-145-5p_+_3	0	0	0	0	0	0	0	0	#DIV/0!
mmu-mir-183-5p_+_7	0	0	0	0	0	0	0	0	#DIV/0!
mmu-mir-10b-3p	0	0	0	0	0	0	0	0	#DIV/0!
mmu-mir-421-3p_+_3	0	0	0	0	0	0	0	0	#DIV/0!
mmu-mir-467e-5p_+_1	0	0	0	0	0	0	0	0	#DIV/0!
mmu-mir-183-3p	0	0	0	0	0	0	0	0	#DIV/0!
mmu-mir-382-5p_+_1	0	0	0	0	0	0	0	0	#DIV/0!
mmu-mir-495-3p	0	0	0	0	0	0	0	0	#DIV/0!
mmu-mir-3074-2-5p	0	0	0	0	0	0	0	0	#DIV/0!
mmu-mir-138-1-5p	0	0	0	0	0	0	0	0	#DIV/0!
mmu-mir-1a-2-3p	0	0	0	0	0	0	0	0	#DIV/0!
mmu-mir-141-5p_-_2	0	0	0	0	0	0	0	0	#DIV/0!
mmu-mir-490-5p	0	0	0	0	0	0	0	0	#DIV/0!
mmu-let-7c-1-5p_+_2	0	0	0	0	0	0	0	0	#DIV/0!
mmu-mir-200a-3p_+_1	0	0	0	0	0	0	0	0	#DIV/0!
mmu-mir-20a-3p	0	0	0	0	0	0	0	0	#DIV/0!
mmu-mir-467c-5p	0	0	0	0	0	0	0	0	#DIV/0!
mmu-mir-196a-2-5p	0	0	0	0	0	0	0	0	#DIV/0!
mmu-mir-127-3p_-_2	0	0	0	0	0	0	0	0	#DIV/0!
mmu-mir-9-3-5p	0	0	0	0	0	0	0	0	#DIV/0!
mmu-mir-667-3p	0	0	0	0	0	0	0	0	#DIV/0!
mmu-mir-214-5p_+_1	0	0	0	0	0	0	0	0	#DIV/0!
mmu-mir-145-5p_+_1	0	0	0	0	0	0	0	0	#DIV/0!
mmu-mir-153-3p	0	0	0	0	0	0	0	0	#DIV/0!
mmu-mir-384-5p	0	0	0	0	0	0	0	0	#DIV/0!
mmu-mir-411-3p	0	0	0	0	0	0	0	0	#DIV/0!
mmu-mir-218-1-3p	0	0	0	0	0	0	0	0	#DIV/0!
mmu-mir-1224-5p	0	0	0	0	0	0	0	0	#DIV/0!
mmu-mir-329-3p	0	0	0	0	0	0	0	0	#DIV/0!
mmu-mir-668-3p_-_1	0	0	0	0	0	0	0	0	#DIV/0!
mmu-mir-300-3p_+_4	0	0	0	0	0	0	0	0	#DIV/0!
mmu-mir-124-1-3p	0	0	0	0	0	0	0	0	#DIV/0!
mmu-mir-23b-5p	0	0	0	0	0	0	0	0	#DIV/0!
mmu-mir-127-5p	0	0	0	0	0	0	0	0	#DIV/0!
mmu-mir-10b-3p_-_1	0	0	0	0	0	0	0	0	#DIV/0!
mmu-mir-5117-3p_-_3	0	0	0	0	0	0	0	0	#DIV/0!
mmu-let-7e-5p_+_5	0	0	0	0	0	0	0	0	#DIV/0!
mmu-mir-455-5p_-_1	0	0	0	0	0	0	0	0	#DIV/0!
mmu-mir-154-5p	0	0	0	0	0	0	0	0	#DIV/0!
mmu-mir-1983	0	0	0	0	0	0	0	0	#DIV/0!
mmu-mir-10b-3p_+_1	0	0	0	0	0	0	0	0	#DIV/0!
mmu-mir-369-5p	0	0	0	0	0	0	0	0	#DIV/0!
mmu-mir-143-3p_+_4	0	0	0	0	0	0	0	0	#DIV/0!
mmu-mir-10a-5p_-_2	0	0	0	0	0	0	0	0	#DIV/0!
mmu-mir-299-5p	0	0	0	0	0	0	0	0	#DIV/0!
mmu-mir-127-5p_+_2	0	0	0	0	0	0	0	0	#DIV/0!
mmu-mir-673-3p	0	0	0	0	0	0	0	0	#DIV/0!
mmu-mir-200c-3p_-_1	0	0	0	0	0	0	0	0	#DIV/0!
mmu-let-7i-5p_+_5	0	0	0	0	0	0	0	0	#DIV/0!
mmu-mir-1a-1-3p	0	0	0	0	0	0	0	0	#DIV/0!
mmu-mir-130b-3p_+_1	0	0	0	0	0	0	0	0	#DIV/0!
mmu-mir-483-3p_+_1	0	0	0	0	0	0	0	0	#DIV/0!
mmu-mir-7b-5p	0	0	0	0	0	0	0	0	#DIV/0!
mmu-mir-26a-1-3p	0	0	0	0	0	0	0	0	#DIV/0!
mmu-mir-487b-3p	0	0	0	0	0	0	0	0	#DIV/0!
mmu-mir-708-3p_+_1	0	0	0	0	0	0	0	0	#DIV/0!
mmu-mir-363-3p_+_1	0	0	0	0	0	0	0	0	#DIV/0!
mmu-mir-147-3p_-_1	0	0	0	0	0	0	0	0	#DIV/0!
mmu-mir-760-3p	0	0	0	0	0	0	0	0	#DIV/0!
mmu-mir-3102-3p_+_3	0	0	0	0	0	0	0	0	#DIV/0!
mmu-mir-449a-5p	0	0	0	0	0	0	0	0	#DIV/0!
mmu-mir-434-5p_-_1	0	0	0	0	0	0	0	0	#DIV/0!
mmu-mir-129-2-3p	0	0	0	0	0	0	0	0	#DIV/0!
mmu-mir-218-2-5p	0	0	0	0	0	0	0	0	#DIV/0!
mmu-mir-23a-3p_+_3	0	0	0	0	0	0	0	0	#DIV/0!
mmu-mir-369-3p	0	0	0	0	0	0	0	0	#DIV/0!
mmu-mir-10b-5p_+_5	0	0	0	0	0	0	0	0	#DIV/0!
mmu-mir-429-3p_+_1	0	0	0	0	0	0	0	0	#DIV/0!
mmu-mir-215-5p_-_1	0	0	0	0	0	0	0	0	#DIV/0!
mmu-mir-375-5p	0	0	0	0	0	0	0	0	#DIV/0!
mmu-mir-543-3p	0	0	0	0	0	0	0	0	#DIV/0!
mmu-mir-204-5p	0	0	0	0	0	0	0	0	#DIV/0!
mmu-mir-133b-3p_+_1	0	0	0	0	0	0	0	0	#DIV/0!
mmu-mir-21-5p_+_3	0	0	0	0	0	0	0	0	#DIV/0!
mmu-mir-196a-1-5p	0	0	0	0	0	0	0	0	#DIV/0!
mmu-mir-429-3p_-_1	0	0	0	0	0	0	0	0	#DIV/0!
mmu-mir-34b-3p	0	0	0	0	0	0	0	0	#DIV/0!
mmu-mir-19a-3p_-_1	0	0	0	0	0	0	0	0	#DIV/0!
mmu-mir-488-3p	0	0	0	0	0	0	0	0	#DIV/0!
mmu-mir-28-3p_+_2	0	0	0	0	0	0	0	0	#DIV/0!
mmu-mir-182-5p_+_5	0	0	0	0	0	0	0	0	#DIV/0!
mmu-mir-376a-3p	0	0	0	0	0	0	0	0	#DIV/0!
mmu-mir-138-2-5p	0	0	0	0	0	0	0	0	#DIV/0!
mmu-mir-196a-1-5p_+_1	0	0	0	0	0	0	0	0	#DIV/0!
mmu-mir-24-1-5p	0	0	0	0	0	0	0	0	#DIV/0!
mmu-mir-1199-5p	0	0	0	0	0	0	0	0	#DIV/0!
mmu-mir-200b-3p_-_1	0	0	0	0	0	0	0	0	#DIV/0!
mmu-mir-5117-3p	0	0	0	0	0	0	0	0	#DIV/0!
mmu-mir-10b-5p_+_3	0	0	0	0	0	0	0	0	#DIV/0!
mmu-mir-708-3p	0	0	0	0	0	0	0	0	#DIV/0!
mmu-mir-145-5p_+_4	0	0	0	0	0	0	0	0	#DIV/0!
mmu-mir-145-3p_+_1	0	0	0	0	0	0	0	0	#DIV/0!
mmu-let-7f-2-5p_+_2	0	0	0	0	0	0	0	0	#DIV/0!
mmu-mir-433-3p	0	0	0	0	0	0	0	0	#DIV/0!
mmu-mir-770-3p	0	0	0	0	0	0	0	0	#DIV/0!
mmu-mir-490-3p_-_2	0	0	0	0	0	0	0	0	#DIV/0!
mmu-mir-200c-5p	0	0	0	0	0	0	0	0	#DIV/0!
mmu-mir-127-3p_+_1	0	0	0	0	0	0	0	0	#DIV/0!
mmu-mir-7a-2-3p	0	0	0	0	0	0	0	0	#DIV/0!
mmu-mir-204-3p	0	0	0	0	0	0	0	0	#DIV/0!
mmu-mir-485-3p_+_3	0	0	0	0	0	0	0	0	#DIV/0!
mmu-mir-5122	0	0	0	0	0	0	0	0	#DIV/0!
mmu-mir-145-3p_+_3	0	0	0	0	0	0	0	0	#DIV/0!
mmu-mir-196b-3p	0	0	0	0	0	0	0	0	#DIV/0!
mmu-mir-383-5p_-_1	0	0	0	0	0	0	0	0	#DIV/0!
mmu-mir-376b-5p	0	0	0	0	0	0	0	0	#DIV/0!
mmu-mir-103-2-5p	0	0	0	0	0	0	0	0	#DIV/0!
mmu-mir-370-3p	0	0	0	0	0	0	0	0	#DIV/0!
mmu-mir-125a-5p_+_3	0	0	0	0	0	0	0	0	#DIV/0!
mmu-mir-376c-3p	0	0	0	0	0	0	0	0	#DIV/0!
mmu-mir-378-3p_+_6	0	0	0	0	0	0	0	0	#DIV/0!
mmu-mir-24-2-5p_+_1	0	0	0	0	0	0	0	0	#DIV/0!
mmu-mir-92a-1-5p_+_1	0	0	0	0	0	0	0	0	#DIV/0!
mmu-let-7i-5p_-_1	0	0	0	0	0	0	0	0	#DIV/0!
mmu-mir-3572_-_1	0	0	0	0	0	0	0	0	#DIV/0!
mmu-mir-147-3p	0	0	0	0	0	0	0	0	#DIV/0!
mmu-let-7i-5p_+_3	0	0	0	0	0	0	0	0	#DIV/0!
mmu-mir-214-3p_+_1	0	0	0	0	0	0	0	0	#DIV/0!
mmu-mir-679-5p_-_2	0	0	0	0	0	0	0	0	#DIV/0!
mmu-mir-3099-3p	0	0	0	0	0	0	0	0	#DIV/0!
mmu-mir-379-3p	0	0	0	0	0	0	0	0	#DIV/0!
mmu-mir-877-5p_+_1	0	0	0	0	0	0	0	0	#DIV/0!
mmu-mir-196a-1-3p	0	0	0	0	0	0	0	0	#DIV/0!
mmu-mir-485-5p	0	0	0	0	0	0	0	0	#DIV/0!
mmu-mir-145-5p_+_2	0	0	0	0	0	0	0	0	#DIV/0!
mmu-mir-496-3p_+_2	0	0	0	0	0	0	0	0	#DIV/0!
mmu-mir-125a-3p_+_1	0	0	0	0	0	0	0	0	#DIV/0!
mmu-mir-143-3p_+_5	0	0	0	0	0	0	0	0	#DIV/0!
mmu-mir-141-3p_+_1	0	0	0	0	0	0	0	0	#DIV/0!
mmu-let-7f-1-5p_+_2	0	0	0	0	0	0	0	0	#DIV/0!
mmu-mir-136-3p_+_1	0	0	0	0	0	0	0	0	#DIV/0!
mmu-mir-181c-5p_+_1	0	0	0	0	0	0	0	0	#DIV/0!
mmu-mir-196a-2-5p_+_1	0	0	0	0	0	0	0	0	#DIV/0!
mmu-mir-9-1-5p	0	0	0	0	0	0	0	0	#DIV/0!
mmu-mir-125a-5p_-_1	0	0	0	0	0	0	0	0	#DIV/0!
mmu-mir-666-5p	0	0	0	0	0	0	0	0	#DIV/0!
mmu-mir-376b-3p	0	0	0	0	0	0	0	0	#DIV/0!
mmu-mir-24-1-5p_-_1	0	0	0	0	0	0	0	0	#DIV/0!
mmu-mir-24-2-5p_-_1	0	0	0	0	0	0	0	0	#DIV/0!
mmu-mir-3074-1-3p	0	0	0	0	0	0	0	0	#DIV/0!
mmu-let-7b-5p_+_3	0	0	0	0	0	0	0	0	#DIV/0!
mmu-mir-485-3p	0	0	0	0	0	0	0	0	#DIV/0!
mmu-mir-141-5p	0	0	0	0	0	0	0	0	#DIV/0!
mmu-mir-143-3p_-_3	0	0	0	0	0	0	0	0	#DIV/0!
mmu-mir-485-5p_-_2	0	0	0	0	0	0	0	0	#DIV/0!
mmu-mir-133a-2-3p_+_2	0	0	0	0	0	0	0	0	#DIV/0!
mmu-let-7d-5p_+_1	0	0	0	0	0	0	0	0	#DIV/0!
mmu-mir-136-3p	0	0	0	0	0	0	0	0	#DIV/0!
mmu-mir-1306-3p_-_1	0	0	0	0	0	0	0	0	#DIV/0!
mmu-mir-136-5p_-_3	0	0	0	0	0	0	0	0	#DIV/0!
mmu-mir-541-5p_+_1	0	0	0	0	0	0	0	0	#DIV/0!
mmu-mir-182-5p_+_1	0	0	0	0	0	0	0	0	#DIV/0!
mmu-let-7a-1-5p_+_1	0	0	0	0	0	0	0	0	#DIV/0!
